# Supplementary material for: Beyond Black Boxes: Designing and Testing Agentic AI Systems for Strategy
Source: Atypon-hosted journal article supplement (doi:10.1287/stsc.2025.0432), 2026-02-20
Supplement: stsc.2025.0432.sm1.pdf [file stsc.2025.0432.sm1.pdf]

# Online Appendix

## Beyond Black Boxes: Designing and Testing Agentic AI Systems for Strategy

Arnaldo Camuffo <sup>a,b</sup> Alfonso Gambardella <sup>a,b</sup> Saeid Kazemi <sup>a,b</sup> Abhinav Pandey <sup>a,b</sup>

<sup>a</sup>Department of Management & Technology, Bocconi University, Milan, Italy.

<sup>b</sup>ION Management Science Lab (IMSL) at SDA Bocconi, Milan, Italy.

*Correspondent Email: [arnaldo.camuffo@unibocconi.it](mailto:arnaldo.camuffo@unibocconi.it)*

## Appendix

### A. Randomization checks

**Table A1 Descriptive Statistics: Pre, Post, and Differences**

| Variable                        | Pre |        |        |       |         | Post |        |        |       |         | $\Delta$ (Post – Pre) |        |        |         |        |
|---------------------------------|-----|--------|--------|-------|---------|------|--------|--------|-------|---------|-----------------------|--------|--------|---------|--------|
|                                 | N   | Mean   | SD     | Min   | Max     | N    | Mean   | SD     | Min   | Max     | N                     | Mean   | SD     | Min     | Max    |
| <i>Total Sample</i>             |     |        |        |       |         |      |        |        |       |         |                       |        |        |         |        |
| SPS ( $\Theta$ )                | 976 | 63.258 | 23.477 | 0.000 | 100.000 | 976  | 70.519 | 22.337 | 0.000 | 100.000 | 976                   | 7.261  | 12.164 | -50.000 | 80.000 |
| CIT (1–7)                       | 976 | 5.107  | 1.402  | 1.000 | 7.000   | 976  | 5.465  | 1.290  | 1.000 | 7.000   | 976                   | 0.359  | 0.846  | -4.000  | 4.000  |
| GenAI Familiarity               | 976 | 4.630  | 1.738  | 1.000 | 7.000   | 976  | 4.722  | 1.716  | 1.000 | 7.000   | 976                   | 0.092  | 0.835  | -4.000  | 5.000  |
| Prompt Skills                   | 976 | 4.868  | 1.515  | 1.000 | 7.000   | 976  | 4.993  | 1.542  | 1.000 | 7.000   | 976                   | 0.125  | 0.853  | -4.000  | 6.000  |
| Algorithmic Aversion            | 976 | 4.994  | 1.193  | 1.000 | 7.000   | 976  | 4.756  | 1.286  | 1.000 | 7.000   | 976                   | -0.238 | 1.157  | -5.000  | 4.000  |
| Automation Bias                 | 976 | 4.041  | 1.406  | 1.000 | 7.000   | 976  | 4.206  | 1.477  | 1.000 | 7.000   | 976                   | 0.165  | 1.082  | -4.000  | 5.000  |
| Confidence ( $\omega$ )         | 976 | 5.308  | 1.113  | 1.000 | 7.000   | 976  | 5.261  | 1.217  | 1.000 | 7.000   | 976                   | -0.047 | 1.024  | -5.000  | 5.000  |
| LLM: PS                         | 976 | 19.307 | 4.223  | 2.900 | 28.100  | 976  | 19.771 | 3.856  | 5.300 | 33.400  | 976                   | 0.464  | 2.515  | -15.900 | 13.350 |
| LLM: Confidence                 | 976 | 4.599  | 0.195  | 3.750 | 6.050   | 976  | 4.592  | 0.194  | 3.900 | 5.800   | 976                   | -0.007 | 0.180  | -1.150  | 1.150  |
| LLM: Answer quality             | 976 | 3.087  | 0.536  | 1.050 | 4.000   | 976  | 3.175  | 0.493  | 1.000 | 4.000   | 976                   | 0.088  | 0.316  | -2.150  | 1.800  |
| Expert: PS (0–100)              | 976 | 37.095 | 27.915 | 5.000 | 90.000  | 976  | 43.709 | 29.232 | 5.000 | 95.000  | 976                   | 6.614  | 25.289 | -70.000 | 85.000 |
| Expert: Confidence              | 976 | 6.027  | 0.695  | 4.000 | 7.000   | 976  | 5.944  | 0.656  | 3.000 | 7.000   | 976                   | -0.083 | 0.805  | -3.000  | 3.000  |
| Expert: Answer quality          | 976 | 2.622  | 1.266  | 1.000 | 5.000   | 975  | 2.872  | 1.264  | 1.000 | 5.000   | 975                   | 0.252  | 1.153  | -3.000  | 4.000  |
| <i>Control Group</i>            |     |        |        |       |         |      |        |        |       |         |                       |        |        |         |        |
| SPS ( $\Theta$ )                | 328 | 63.201 | 23.368 | 1.000 | 100.000 | 328  | 68.354 | 23.389 | 1.000 | 100.000 | 328                   | 5.152  | 10.445 | -50.000 | 76.000 |
| CIT (1–7)                       | 328 | 5.229  | 1.368  | 1.000 | 7.000   | 328  | 5.418  | 1.343  | 1.000 | 7.000   | 328                   | 0.189  | 0.726  | -3.000  | 4.000  |
| GenAI Familiarity               | 328 | 4.854  | 1.730  | 1.000 | 7.000   | 328  | 4.872  | 1.719  | 1.000 | 7.000   | 328                   | 0.018  | 0.908  | -3.000  | 5.000  |
| Prompt Skills                   | 328 | 5.027  | 1.468  | 1.000 | 7.000   | 328  | 5.107  | 1.481  | 1.000 | 7.000   | 328                   | 0.079  | 0.734  | -4.000  | 3.000  |
| Algorithmic Aversion            | 328 | 4.948  | 1.184  | 2.000 | 7.000   | 328  | 4.936  | 1.198  | 1.000 | 7.000   | 328                   | -0.012 | 1.005  | -3.000  | 4.000  |
| Automation Bias                 | 328 | 4.125  | 1.403  | 1.000 | 7.000   | 328  | 4.067  | 1.468  | 1.000 | 7.000   | 328                   | -0.058 | 0.961  | -4.000  | 3.000  |
| Confidence ( $\omega$ )         | 328 | 5.259  | 1.132  | 1.000 | 7.000   | 328  | 5.311  | 1.249  | 1.000 | 7.000   | 328                   | 0.052  | 0.996  | -4.000  | 5.000  |
| LLM: PS                         | 328 | 19.285 | 4.113  | 6.900 | 28.100  | 328  | 19.433 | 3.946  | 7.750 | 33.400  | 328                   | 0.148  | 2.006  | -4.600  | 10.810 |
| LLM: Confidence                 | 328 | 4.585  | 0.192  | 3.750 | 5.400   | 328  | 4.597  | 0.191  | 3.900 | 5.650   | 328                   | 0.012  | 0.166  | -0.650  | 0.950  |
| LLM: Answer quality             | 328 | 3.079  | 0.531  | 1.160 | 3.950   | 328  | 3.113  | 0.496  | 1.600 | 3.950   | 328                   | 0.035  | 0.211  | -0.450  | 1.340  |
| Expert: PS (0–100)              | 328 | 35.671 | 27.347 | 5.000 | 90.000  | 328  | 40.274 | 28.496 | 5.000 | 90.000  | 328                   | 4.604  | 19.080 | -70.000 | 75.000 |
| Expert: Confidence              | 328 | 6.043  | 0.667  | 4.000 | 7.000   | 328  | 5.994  | 0.668  | 4.000 | 7.000   | 328                   | -0.049 | 0.702  | -3.000  | 2.000  |
| Expert: Answer quality          | 328 | 2.573  | 1.229  | 1.000 | 5.000   | 328  | 2.741  | 1.250  | 1.000 | 5.000   | 328                   | 0.168  | 0.967  | -2.000  | 4.000  |
| <i>General AI (Treatment 1)</i> |     |        |        |       |         |      |        |        |       |         |                       |        |        |         |        |
| SPS ( $\Theta$ )                | 322 | 63.752 | 23.632 | 0.000 | 100.000 | 322  | 71.528 | 21.578 | 0.000 | 100.000 | 322                   | 7.776  | 12.195 | -50.000 | 80.000 |
| CIT (1–7)                       | 322 | 5.037  | 1.493  | 1.000 | 7.000   | 322  | 5.481  | 1.239  | 1.000 | 7.000   | 322                   | 0.444  | 0.913  | -3.000  | 4.000  |
| GenAI Familiarity               | 322 | 4.562  | 1.720  | 1.000 | 7.000   | 322  | 4.677  | 1.682  | 1.000 | 7.000   | 322                   | 0.115  | 0.746  | -4.000  | 3.000  |
| Prompt Skills                   | 322 | 4.764  | 1.518  | 1.000 | 7.000   | 322  | 4.929  | 1.576  | 1.000 | 7.000   | 322                   | 0.165  | 0.840  | -4.000  | 4.000  |
| Algorithmic Aversion            | 322 | 5.016  | 1.156  | 2.000 | 7.000   | 322  | 4.568  | 1.244  | 1.000 | 7.000   | 322                   | -0.447 | 1.127  | -4.000  | 4.000  |
| Automation Bias                 | 322 | 3.960  | 1.314  | 1.000 | 7.000   | 322  | 4.332  | 1.451  | 1.000 | 7.000   | 322                   | 0.373  | 1.034  | -3.000  | 4.000  |
| Confidence ( $\omega$ )         | 322 | 5.335  | 1.110  | 1.000 | 7.000   | 322  | 5.233  | 1.199  | 1.000 | 7.000   | 322                   | -0.102 | 1.010  | -3.000  | 5.000  |
| LLM: PS                         | 322 | 19.340 | 4.227  | 6.160 | 27.560  | 322  | 19.901 | 3.792  | 6.350 | 26.150  | 322                   | 0.562  | 2.661  | -8.200  | 11.450 |
| LLM: Confidence                 | 322 | 4.590  | 0.178  | 4.150 | 5.700   | 322  | 4.593  | 0.179  | 3.950 | 5.750   | 322                   | 0.003  | 0.169  | -0.450  | 0.550  |
| LLM: Answer quality             | 322 | 3.068  | 0.542  | 1.050 | 4.000   | 322  | 3.219  | 0.504  | 1.000 | 4.000   | 322                   | 0.150  | 0.348  | -1.050  | 1.500  |
| Expert: PS (0–100)              | 322 | 36.941 | 27.514 | 5.000 | 90.000  | 322  | 48.276 | 29.850 | 5.000 | 95.000  | 322                   | 11.335 | 29.515 | -60.000 | 85.000 |
| Expert: Confidence              | 322 | 5.988  | 0.706  | 4.000 | 7.000   | 322  | 5.938  | 0.643  | 4.000 | 7.000   | 322                   | -0.050 | 0.878  | -3.000  | 2.000  |
| Expert: Answer quality          | 322 | 2.596  | 1.245  | 1.000 | 5.000   | 322  | 3.043  | 1.265  | 1.000 | 5.000   | 322                   | 0.447  | 1.297  | -3.000  | 4.000  |
| <i>Agentic AI (Treatment 2)</i> |     |        |        |       |         |      |        |        |       |         |                       |        |        |         |        |
| SPS ( $\Theta$ )                | 326 | 62.828 | 23.496 | 0.000 | 100.000 | 326  | 71.702 | 21.897 | 6.000 | 100.000 | 326                   | 8.874  | 13.411 | -47.000 | 75.000 |
| CIT (1–7)                       | 326 | 5.052  | 1.338  | 1.000 | 7.000   | 326  | 5.497  | 1.288  | 1.000 | 7.000   | 326                   | 0.445  | 0.867  | -4.000  | 4.000  |
| GenAI Familiarity               | 326 | 4.472  | 1.745  | 1.000 | 7.000   | 326  | 4.617  | 1.741  | 1.000 | 7.000   | 326                   | 0.144  | 0.838  | -4.000  | 3.000  |
| Prompt Skills                   | 326 | 4.810  | 1.549  | 1.000 | 7.000   | 326  | 4.942  | 1.567  | 1.000 | 7.000   | 326                   | 0.132  | 0.969  | -4.000  | 6.000  |
| Algorithmic Aversion            | 326 | 5.018  | 1.240  | 1.000 | 7.000   | 326  | 4.761  | 1.385  | 1.000 | 7.000   | 326                   | -0.258 | 1.285  | -5.000  | 4.000  |
| Automation Bias                 | 326 | 4.037  | 1.492  | 1.000 | 7.000   | 326  | 4.221  | 1.505  | 1.000 | 7.000   | 326                   | 0.184  | 1.196  | -4.000  | 5.000  |
| Confidence ( $\omega$ )         | 326 | 5.331  | 1.099  | 1.000 | 7.000   | 326  | 5.239  | 1.204  | 2.000 | 7.000   | 326                   | -0.092 | 1.060  | -5.000  | 3.000  |
| LLM: PS                         | 326 | 19.298 | 4.340  | 2.900 | 27.250  | 326  | 19.983 | 3.816  | 5.300 | 26.550  | 326                   | 0.685  | 2.788  | -15.900 | 13.350 |
| LLM: Confidence                 | 326 | 4.620  | 0.211  | 4.100 | 6.050   | 326  | 4.584  | 0.212  | 4.100 | 5.800   | 326                   | -0.036 | 0.200  | -1.150  | 1.150  |
| LLM: Answer quality             | 326 | 3.115  | 0.537  | 1.550 | 3.950   | 326  | 3.194  | 0.474  | 1.400 | 3.950   | 326                   | 0.079  | 0.359  | -2.150  | 1.800  |
| Expert: PS (0–100)              | 326 | 38.681 | 28.862 | 5.000 | 90.000  | 326  | 42.653 | 28.859 | 5.000 | 90.000  | 326                   | 3.972  | 25.665 | -70.000 | 80.000 |
| Expert: Confidence              | 326 | 6.049  | 0.713  | 4.000 | 7.000   | 326  | 5.899  | 0.656  | 3.000 | 7.000   | 326                   | -0.150 | 0.826  | -3.000  | 3.000  |
| Expert: Answer quality          | 326 | 2.696  | 1.323  | 1.000 | 5.000   | 325  | 2.834  | 1.263  | 1.000 | 5.000   | 325                   | 0.145  | 1.152  | -3.000  | 3.000  |

Notes: SPS = subjective probability of success (0–100). CIT = confidence in theory (1–7). Confidence ( $\omega$ ) denotes the prior on theory validity (1–7). Expert SPS is on the 0–1 scale; LLM SPS is reported in its original scale. “Diff” reports individual-level post–pre changes. Group labels: “General AI” corresponds to Treatment 1; “Agentic AI” corresponds to Treatment 2.

**Table A2 Balance checks across all experimental conditions, whole sample**

| Variable                  | Control |       | GPT    |       | Agentic |       | Pairwise t-test |           |          |
|---------------------------|---------|-------|--------|-------|---------|-------|-----------------|-----------|----------|
|                           | Mean    | SE    | Mean   | SE    | Mean    | SE    | t(C-G)          | t(C-A)    | t(G-A)   |
| age                       | 4.037   | 0.073 | 4.137  | 0.069 | 4.034   | 0.070 | -0.993          | 0.028     | 1.048    |
| experience                | 4.341   | 0.084 | 4.410  | 0.085 | 4.359   | 0.083 | -0.573          | -0.148    | 0.430    |
| managerialExperience      | 2.988   | 0.083 | 3.124  | 0.086 | 3.018   | 0.084 | -1.144          | -0.260    | 0.884    |
| entrepreneurialExperience | 1.491   | 0.028 | 1.450  | 0.028 | 1.472   | 0.028 | 1.035           | 0.472     | -0.563   |
| algoAversion diff         | -0.012  | 0.055 | -0.447 | 0.063 | -0.258  | 0.071 | 5.198***        | 2.723***  | -1.996** |
| algoLove diff             | 0.366   | 0.061 | 0.714  | 0.064 | 0.656   | 0.069 | -3.934***       | -3.160*** | 0.612    |
| automationBias diff       | -0.058  | 0.053 | 0.373  | 0.058 | 0.184   | 0.066 | -5.501***       | -2.853*** | 2.146**  |
| confidence diff           | 0.052   | 0.055 | -0.102 | 0.056 | -0.092  | 0.059 | 1.961*          | 1.789*    | -0.129   |
| KD1                       | 4.308   | 0.087 | 4.575  | 0.090 | 4.442   | 0.094 | -2.128**        | -1.048    | 1.021    |
| KD2                       | 5.692   | 0.059 | 5.898  | 0.060 | 5.822   | 0.063 | -2.451**        | -1.516    | 0.870    |
| KB1                       | 5.250   | 0.077 | 5.391  | 0.078 | 5.472   | 0.075 | -1.287          | -2.070**  | -0.748   |
| KB2                       | 5.735   | 0.059 | 5.925  | 0.060 | 5.908   | 0.059 | -2.269**        | -2.075**  | 0.207    |
| <i>Gender</i>             |         |       |        |       |         |       |                 |           |          |
| Male                      | 0.537   | 0.028 | 0.516  | 0.028 | 0.521   | 0.028 | 0.537           | 0.387     | -0.151   |
| Female                    | 0.454   | 0.028 | 0.481  | 0.028 | 0.475   | 0.028 | -0.691          | -0.543    | 0.150    |
| Non-Binary                | 0.003   | 0.003 | 0.003  | 0.003 | 0.003   | 0.003 | -0.013          | -0.004    | 0.009    |
| Not Disclosed             | 0.006   | 0.004 | 0.000  | 0.000 | 0.000   | 0.000 | 1.403           | 1.412     | .        |
| <i>Education Level</i>    |         |       |        |       |         |       |                 |           |          |
| High School               | 0.006   | 0.004 | 0.006  | 0.004 | 0.003   | 0.003 | -0.018          | 0.573     | 0.589    |
| Associate or Diploma      | 0.021   | 0.008 | 0.028  | 0.009 | 0.018   | 0.007 | -0.543          | 0.269     | 0.807    |
| Undergrad                 | 0.506   | 0.028 | 0.568  | 0.028 | 0.521   | 0.028 | -1.591          | -0.393    | 1.197    |
| Masters                   | 0.341   | 0.026 | 0.286  | 0.025 | 0.347   | 0.026 | 1.532           | -0.139    | -1.668*  |
| Doctoral                  | 0.125   | 0.018 | 0.112  | 0.018 | 0.110   | 0.017 | 0.520           | 0.577     | 0.055    |
| <i>Education Field</i>    |         |       |        |       |         |       |                 |           |          |
| Business and Economics    | 0.168   | 0.021 | 0.205  | 0.023 | 0.233   | 0.023 | -1.221          | -2.095**  | -0.866   |
| STEM                      | 0.354   | 0.026 | 0.329  | 0.026 | 0.316   | 0.026 | 0.657           | 1.021     | 0.360    |
| Health Sciences           | 0.122   | 0.018 | 0.075  | 0.015 | 0.132   | 0.019 | 2.032**         | -0.382    | -2.405** |
| Arts and Humanities       | 0.155   | 0.020 | 0.158  | 0.020 | 0.150   | 0.020 | -0.101          | 0.184     | 0.284    |
| Social Sciences           | 0.107   | 0.017 | 0.130  | 0.019 | 0.107   | 0.017 | -0.935          | -0.027    | 0.907    |
| Other                     | 0.095   | 0.016 | 0.102  | 0.017 | 0.061   | 0.013 | -0.341          | 1.582     | 1.913*   |
| <i>Industry</i>           |         |       |        |       |         |       |                 |           |          |
| Technology                | 0.250   | 0.024 | 0.242  | 0.024 | 0.209   | 0.023 | 0.229           | 1.259     | 1.024    |
| Healthcare                | 0.155   | 0.020 | 0.109  | 0.017 | 0.160   | 0.020 | 1.762*          | -0.141    | -1.899*  |
| Education                 | 0.119   | 0.018 | 0.115  | 0.018 | 0.138   | 0.019 | 0.158           | -0.730    | -0.885   |
| Manufacturing             | 0.064   | 0.014 | 0.075  | 0.015 | 0.058   | 0.013 | -0.527          | 0.306     | 0.830    |
| Retail                    | 0.061   | 0.013 | 0.068  | 0.014 | 0.074   | 0.014 | -0.380          | -0.645    | -0.262   |
| Finance                   | 0.104   | 0.017 | 0.112  | 0.018 | 0.098   | 0.017 | -0.334          | 0.233     | 0.566    |
| Others                    | 0.247   | 0.024 | 0.280  | 0.025 | 0.264   | 0.024 | -0.942          | -0.494    | 0.449    |
| <i>Job Function</i>       |         |       |        |       |         |       |                 |           |          |
| Marketing and Sales       | 0.256   | 0.024 | 0.252  | 0.024 | 0.276   | 0.025 | 0.133           | -0.577    | -0.707   |
| R&D                       | 0.119   | 0.018 | 0.090  | 0.016 | 0.092   | 0.016 | 1.201           | 1.118     | -0.087   |
| Accounting and Finance    | 0.049   | 0.012 | 0.050  | 0.012 | 0.025   | 0.009 | -0.053          | 1.649*    | 1.696*   |
| Human Resources           | 0.064   | 0.014 | 0.087  | 0.016 | 0.080   | 0.015 | -1.107          | -0.778    | 0.331    |
| Operations                | 0.055   | 0.013 | 0.081  | 0.015 | 0.046   | 0.012 | -1.312          | 0.517     | 1.818*   |
| Supply Chain              | 0.159   | 0.020 | 0.199  | 0.022 | 0.196   | 0.022 | -1.339          | -1.264    | 0.078    |
| Legal                     | 0.009   | 0.005 | 0.016  | 0.007 | 0.028   | 0.009 | -0.737          | -1.760*   | -1.057   |
| Information Tech          | 0.009   | 0.005 | 0.016  | 0.007 | 0.028   | 0.009 | -0.737          | -1.760*   | -1.057   |
| Strategy and Planning     | 0.235   | 0.023 | 0.161  | 0.021 | 0.175   | 0.021 | 2.348**         | 1.900*    | -0.454   |
| Other                     | 0.046   | 0.012 | 0.050  | 0.012 | 0.055   | 0.013 | -0.236          | -0.553    | -0.315   |
| expertID pre              | 0.473   | 0.028 | 0.484  | 0.028 | 0.475   | 0.028 | -0.303          | -0.074    | 0.229    |
| expertID post             | 0.503   | 0.028 | 0.540  | 0.028 | 0.500   | 0.028 | -0.952          | 0.078     | 1.028    |
| algoAversion pre          | 4.948   | 0.065 | 5.016  | 0.064 | 5.018   | 0.069 | -0.734          | -0.741    | -0.031   |
| algoLove pre              | 3.570   | 0.073 | 3.444  | 0.073 | 3.466   | 0.081 | 1.220           | 0.953     | -0.204   |
| automationBias pre        | 4.125   | 0.077 | 3.960  | 0.073 | 4.037   | 0.083 | 1.550           | 0.779     | -0.698   |
| confidence pre            | 5.259   | 0.063 | 5.335  | 0.062 | 5.331   | 0.061 | -0.867          | -0.827    | 0.047    |
| aiExpertise pre           | 4.941   | 0.081 | 4.663  | 0.083 | 4.641   | 0.083 | 2.383**         | 2.571**   | 0.186    |
| aiExpertise diff          | 0.049   | 0.036 | 0.140  | 0.035 | 0.138   | 0.038 | -1.820*         | -1.716*   | 0.033    |

Notes: \* p &lt; 0.10, \*\* p &lt; 0.05, \*\*\* p &lt; 0.01

**Table A3 Balance checks across experimental condition, managers with a PhD subsample**

| Variable                  | Control |       | GPT    |       | Agentic |       | Pairwise t-test |          |         |
|---------------------------|---------|-------|--------|-------|---------|-------|-----------------|----------|---------|
|                           | Mean    | SE    | Mean   | SE    | Mean    | SE    | t(C-G)          | t(C-A)   | t(G-A)  |
| age                       | 4.707   | 0.201 | 4.389  | 0.170 | 4.778   | 0.222 | 1.189           | -0.235   | -1.389  |
| experience                | 5.000   | 0.204 | 4.833  | 0.231 | 5.083   | 0.205 | 0.544           | -0.288   | -0.811  |
| managerialExperience      | 3.268   | 0.257 | 3.083  | 0.247 | 3.583   | 0.244 | 0.516           | -0.884   | -1.442  |
| entrepreneurialExperience | 1.537   | 0.079 | 1.528  | 0.084 | 1.444   | 0.084 | 0.076           | 0.800    | 0.700   |
| algoAversion diff         | 0.073   | 0.132 | -0.306 | 0.214 | -0.111  | 0.202 | 1.545           | 0.780    | -0.661  |
| algoLove diff             | 0.146   | 0.146 | 0.722  | 0.220 | 0.694   | 0.258 | -2.225**        | -1.907*  | 0.082   |
| automationBias diff       | -0.244  | 0.155 | 0.694  | 0.210 | 0.278   | 0.202 | -3.646***       | -2.076** | 1.431   |
| confidence diff           | 0.000   | 0.140 | -0.139 | 0.127 | -0.111  | 0.225 | 0.728           | 0.431    | -0.108  |
| KD1                       | 4.171   | 0.259 | 4.306  | 0.306 | 3.889   | 0.292 | -0.339          | 0.725    | 0.986   |
| KD2                       | 5.610   | 0.160 | 5.778  | 0.207 | 5.472   | 0.205 | -0.650          | 0.536    | 1.048   |
| KB1                       | 5.390   | 0.197 | 5.306  | 0.281 | 5.167   | 0.234 | 0.251           | 0.736    | 0.380   |
| KB2                       | 5.659   | 0.142 | 5.667  | 0.239 | 5.639   | 0.229 | -0.030          | 0.075    | 0.084   |
| <i>Gender</i>             |         |       |        |       |         |       |                 |          |         |
| Male                      | 0.561   | 0.078 | 0.583  | 0.083 | 0.444   | 0.084 | -0.195          | 1.014    | 1.174   |
| Female                    | 0.439   | 0.078 | 0.417  | 0.083 | 0.556   | 0.084 | 0.195           | -1.014   | -1.174  |
| Non-Binary                | 0.000   | 0.000 | 0.000  | 0.000 | 0.000   | 0.000 | .               | .        | .       |
| Not Disclosed             | 0.000   | 0.000 | 0.000  | 0.000 | 0.000   | 0.000 | .               | .        | .       |
| <i>Education Level</i>    |         |       |        |       |         |       |                 |          |         |
| High School               | 0.000   | 0.000 | 0.000  | 0.000 | 0.000   | 0.000 | .               | .        | .       |
| Associate or Diploma      | 0.000   | 0.000 | 0.000  | 0.000 | 0.000   | 0.000 | .               | .        | .       |
| Undergrad                 | 0.000   | 0.000 | 0.000  | 0.000 | 0.000   | 0.000 | .               | .        | .       |
| Masters                   | 0.000   | 0.000 | 0.000  | 0.000 | 0.000   | 0.000 | .               | .        | .       |
| Doctoral                  | 1.000   | 0.000 | 1.000  | 0.000 | 1.000   | 0.000 | .               | .        | .       |
| <i>Education Field</i>    |         |       |        |       |         |       |                 |          |         |
| Business and Economics    | 0.122   | 0.052 | 0.028  | 0.028 | 0.028   | 0.028 | 1.542           | 1.542    | 0.000   |
| STEM                      | 0.415   | 0.078 | 0.556  | 0.084 | 0.417   | 0.083 | -1.231          | -0.018   | 1.174   |
| Health Sciences           | 0.195   | 0.063 | 0.139  | 0.058 | 0.194   | 0.067 | 0.650           | 0.007    | -0.625  |
| Arts and Humanities       | 0.098   | 0.047 | 0.167  | 0.063 | 0.139   | 0.058 | -0.893          | -0.557   | 0.323   |
| Social Sciences           | 0.122   | 0.052 | 0.056  | 0.039 | 0.083   | 0.047 | 1.005           | 0.548    | -0.458  |
| Other                     | 0.049   | 0.034 | 0.056  | 0.039 | 0.139   | 0.058 | -0.132          | -1.371   | -1.189  |
| <i>Industry</i>           |         |       |        |       |         |       |                 |          |         |
| Technology                | 0.244   | 0.068 | 0.250  | 0.073 | 0.167   | 0.063 | -0.061          | 0.826    | 0.863   |
| Healthcare                | 0.195   | 0.063 | 0.111  | 0.053 | 0.222   | 0.070 | 1.008           | -0.289   | -1.261  |
| Education                 | 0.317   | 0.074 | 0.278  | 0.076 | 0.278   | 0.076 | 0.371           | 0.371    | 0.000   |
| Manufacturing             | 0.098   | 0.047 | 0.056  | 0.039 | 0.028   | 0.028 | 0.679           | 1.236    | 0.583   |
| Retail                    | 0.000   | 0.000 | 0.000  | 0.000 | 0.000   | 0.000 | .               | .        | .       |
| Finance                   | 0.049   | 0.034 | 0.028  | 0.028 | 0.028   | 0.028 | 0.470           | 0.470    | 0.000   |
| Others                    | 0.098   | 0.047 | 0.278  | 0.076 | 0.278   | 0.076 | -2.076**        | -2.076** | 0.000   |
| <i>Job Function</i>       |         |       |        |       |         |       |                 |          |         |
| Marketing and Sales       | 0.439   | 0.078 | 0.250  | 0.073 | 0.278   | 0.076 | 1.746*          | 1.469    | -0.264  |
| R&D                       | 0.049   | 0.034 | 0.028  | 0.028 | 0.000   | 0.000 | 0.470           | 1.341    | 1.000   |
| Accounting and Finance    | 0.146   | 0.056 | 0.333  | 0.080 | 0.111   | 0.053 | -1.957*         | 0.453    | 2.320** |
| Human Resources           | 0.049   | 0.034 | 0.000  | 0.000 | 0.028   | 0.028 | 1.341           | 0.470    | -1.000  |
| Operations                | 0.000   | 0.000 | 0.056  | 0.039 | 0.000   | 0.000 | -1.533          | .        | 1.435   |
| Supply Chain              | 0.122   | 0.052 | 0.083  | 0.047 | 0.250   | 0.073 | 0.548           | -1.455   | -1.919* |
| Legal                     | 0.000   | 0.000 | 0.000  | 0.000 | 0.000   | 0.000 | .               | .        | .       |
| Information Tech          | 0.000   | 0.000 | 0.056  | 0.039 | 0.139   | 0.058 | -1.533          | -2.538** | -1.189  |
| Strategy and Planning     | 0.146   | 0.056 | 0.083  | 0.047 | 0.111   | 0.053 | 0.851           | 0.453    | -0.393  |
| Other                     | 0.049   | 0.034 | 0.111  | 0.053 | 0.083   | 0.047 | -1.012          | -0.607   | 0.393   |
| expertID pre              | 0.463   | 0.079 | 0.417  | 0.083 | 0.500   | 0.085 | 0.407           | -0.317   | -0.702  |
| expertID post             | 0.366   | 0.076 | 0.306  | 0.078 | 0.528   | 0.084 | 0.552           | -1.428   | -1.935* |
| algoAversion pre          | 4.878   | 0.179 | 5.194  | 0.218 | 5.361   | 0.222 | -1.133          | -1.710*  | -0.536  |
| algoLove pre              | 3.537   | 0.182 | 2.917  | 0.205 | 3.083   | 0.277 | 2.273**         | 1.399    | -0.484  |
| automationBias pre        | 3.951   | 0.218 | 3.417  | 0.184 | 3.417   | 0.291 | 1.845*          | 1.492    | 0.000   |
| confidence pre            | 4.878   | 0.189 | 5.167  | 0.176 | 4.861   | 0.233 | -1.109          | 0.057    | 1.047   |
| aiExpertise pre           | 4.976   | 0.251 | 4.472  | 0.266 | 4.486   | 0.311 | 1.376           | 1.235    | -0.034  |
| aiExpertise diff          | -0.073  | 0.079 | 0.222  | 0.098 | 0.250   | 0.120 | -2.361**        | -2.294** | -0.179  |

Notes: \* p < 0.10, \*\* p < 0.05, \*\*\* p < 0.01

**Table A4 Balance checks across experimental condition, managers without a PhD subsample**

| Variable                  | Control |       | GPT    |       | Agentic |       | Pairwise t-test |           |          |
|---------------------------|---------|-------|--------|-------|---------|-------|-----------------|-----------|----------|
|                           | Mean    | SE    | Mean   | SE    | Mean    | SE    | t(C-G)          | t(C-A)    | t(G-A)   |
| age                       | 3.941   | 0.077 | 4.105  | 0.075 | 3.941   | 0.072 | -1.529          | -0.006    | 1.580    |
| experience                | 4.247   | 0.090 | 4.357  | 0.091 | 4.269   | 0.088 | -0.854          | -0.172    | 0.692    |
| managerialExperience      | 2.948   | 0.087 | 3.129  | 0.091 | 2.948   | 0.088 | -1.436          | -0.004    | 1.425    |
| entrepreneurialExperience | 1.484   | 0.030 | 1.441  | 0.029 | 1.476   | 0.029 | 1.050           | 0.203     | -0.849   |
| algoAversion diff         | -0.024  | 0.061 | -0.465 | 0.065 | -0.276  | 0.076 | 4.943***        | 2.585***  | -1.884*  |
| algoLove diff             | 0.397   | 0.066 | 0.713  | 0.067 | 0.652   | 0.071 | -3.352***       | -2.624*** | 0.630    |
| automationBias diff       | -0.031  | 0.056 | 0.332  | 0.059 | 0.172   | 0.070 | -4.457***       | -2.260**  | 1.740*   |
| confidence diff           | 0.059   | 0.060 | -0.098 | 0.061 | -0.090  | 0.060 | 1.836*          | 1.760*    | -0.096   |
| KD1                       | 4.328   | 0.092 | 4.608  | 0.094 | 4.510   | 0.098 | -2.131**        | -1.356    | 0.720    |
| KD2                       | 5.704   | 0.063 | 5.913  | 0.062 | 5.866   | 0.065 | -2.355**        | -1.781*   | 0.521    |
| KB1                       | 5.230   | 0.083 | 5.402  | 0.081 | 5.510   | 0.079 | -1.481          | -2.442**  | -0.957   |
| KB2                       | 5.746   | 0.064 | 5.958  | 0.061 | 5.941   | 0.060 | -2.409**        | -2.227**  | 0.195    |
| <i>Gender</i>             |         |       |        |       |         |       |                 |           |          |
| Male                      | 0.533   | 0.030 | 0.507  | 0.030 | 0.531   | 0.029 | 0.625           | 0.050     | -0.577   |
| Female                    | 0.456   | 0.029 | 0.490  | 0.030 | 0.466   | 0.029 | -0.792          | -0.218    | 0.576    |
| Non-Binary                | 0.003   | 0.003 | 0.003  | 0.003 | 0.003   | 0.003 | -0.002          | 0.007     | 0.010    |
| Not Disclosed             | 0.007   | 0.005 | 0.000  | 0.000 | 0.000   | 0.000 | 1.414           | 1.424     | .        |
| <i>Education Level</i>    |         |       |        |       |         |       |                 |           |          |
| High School               | 0.007   | 0.005 | 0.007  | 0.005 | 0.003   | 0.003 | -0.003          | 0.587     | 0.590    |
| Associate or Diploma      | 0.024   | 0.009 | 0.031  | 0.010 | 0.021   | 0.008 | -0.513          | 0.299     | 0.811    |
| Undergrad                 | 0.578   | 0.029 | 0.640  | 0.028 | 0.586   | 0.029 | -1.508          | -0.190    | 1.321    |
| Masters                   | 0.390   | 0.029 | 0.322  | 0.028 | 0.390   | 0.029 | 1.715*          | 0.014     | -1.705*  |
| Doctoral                  | 0.000   | 0.000 | 0.000  | 0.000 | 0.000   | 0.000 | .               | .         | .        |
| <i>Education Field</i>    |         |       |        |       |         |       |                 |           |          |
| Business and Economics    | 0.174   | 0.022 | 0.227  | 0.025 | 0.259   | 0.026 | -1.586          | -2.469**  | -0.876   |
| STEM                      | 0.345   | 0.028 | 0.301  | 0.027 | 0.303   | 0.027 | 1.132           | 1.064     | -0.072   |
| Health Sciences           | 0.111   | 0.019 | 0.066  | 0.015 | 0.124   | 0.019 | 1.897*          | -0.470    | -2.363** |
| Arts and Humanities       | 0.164   | 0.022 | 0.157  | 0.022 | 0.152   | 0.021 | 0.209           | 0.396     | 0.186    |
| Social Sciences           | 0.105   | 0.018 | 0.140  | 0.021 | 0.110   | 0.018 | -1.291          | -0.225    | 1.070    |
| Other                     | 0.101   | 0.018 | 0.108  | 0.018 | 0.052   | 0.013 | -0.287          | 2.238**   | 2.518**  |
| <i>Industry</i>           |         |       |        |       |         |       |                 |           |          |
| Technology                | 0.251   | 0.026 | 0.241  | 0.025 | 0.214   | 0.024 | 0.267           | 1.054     | 0.785    |
| Healthcare                | 0.150   | 0.021 | 0.108  | 0.018 | 0.152   | 0.021 | 1.479           | -0.064    | -1.546   |
| Education                 | 0.091   | 0.017 | 0.094  | 0.017 | 0.121   | 0.019 | -0.157          | -1.175    | -1.017   |
| Manufacturing             | 0.059   | 0.014 | 0.077  | 0.016 | 0.062   | 0.014 | -0.840          | -0.142    | 0.700    |
| Retail                    | 0.070   | 0.015 | 0.077  | 0.016 | 0.083   | 0.016 | -0.332          | -0.591    | -0.258   |
| Finance                   | 0.111   | 0.019 | 0.122  | 0.019 | 0.107   | 0.018 | -0.405          | 0.177     | 0.582    |
| Others                    | 0.268   | 0.026 | 0.280  | 0.027 | 0.262   | 0.026 | -0.306          | 0.169     | 0.476    |
| <i>Job Function</i>       |         |       |        |       |         |       |                 |           |          |
| Marketing and Sales       | 0.230   | 0.025 | 0.252  | 0.026 | 0.276   | 0.026 | -0.609          | -1.268    | -0.656   |
| R&D                       | 0.129   | 0.020 | 0.098  | 0.018 | 0.103   | 0.018 | 1.170           | 0.954     | -0.221   |
| Accounting and Finance    | 0.035   | 0.011 | 0.014  | 0.007 | 0.014   | 0.007 | 1.618           | 1.644     | 0.020    |
| Human Resources           | 0.066   | 0.015 | 0.098  | 0.018 | 0.086   | 0.017 | -1.383          | -0.904    | 0.485    |
| Operations                | 0.063   | 0.014 | 0.084  | 0.016 | 0.052   | 0.013 | -0.973          | 0.568     | 1.538    |
| Supply Chain              | 0.164   | 0.022 | 0.213  | 0.024 | 0.190   | 0.023 | -1.516          | -0.814    | 0.706    |
| Legal                     | 0.010   | 0.006 | 0.017  | 0.008 | 0.031   | 0.010 | -0.716          | -1.734*   | -1.055   |
| Information Tech          | 0.010   | 0.006 | 0.010  | 0.006 | 0.014   | 0.007 | -0.004          | -0.366    | -0.361   |
| Strategy and Planning     | 0.247   | 0.026 | 0.171  | 0.022 | 0.183   | 0.023 | 2.243**         | 1.892*    | -0.359   |
| Other                     | 0.045   | 0.012 | 0.042  | 0.012 | 0.052   | 0.013 | 0.195           | -0.359    | -0.554   |
| expertID pre              | 0.474   | 0.030 | 0.493  | 0.030 | 0.472   | 0.029 | -0.458          | 0.035     | 0.494    |
| expertID post             | 0.523   | 0.030 | 0.570  | 0.029 | 0.497   | 0.029 | -1.136          | 0.626     | 1.767*   |
| algoAversion pre          | 4.958   | 0.070 | 4.993  | 0.067 | 4.976   | 0.072 | -0.358          | -0.176    | 0.174    |
| algoLove pre              | 3.575   | 0.080 | 3.510  | 0.077 | 3.514   | 0.084 | 0.581           | 0.529     | -0.029   |
| automationBias pre        | 4.150   | 0.083 | 4.028  | 0.078 | 4.114   | 0.085 | 1.068           | 0.304     | -0.744   |
| confidence pre            | 5.314   | 0.066 | 5.357  | 0.066 | 5.390   | 0.061 | -0.462          | -0.847    | -0.366   |
| aiExpertise pre           | 4.936   | 0.086 | 4.687  | 0.088 | 4.660   | 0.085 | 2.024**         | 2.270**   | 0.218    |
| aiExpertise diff          | 0.066   | 0.039 | 0.129  | 0.037 | 0.124   | 0.040 | -1.167          | -1.037    | 0.096    |

Notes: \* p &lt; 0.10, \*\* p &lt; 0.05, \*\*\* p &lt; 0.01

**Table A5 Balance checks across experimental condition, managers with high experience subsample**

| Variable                  | Control |       | GPT    |       | Agentic |       | Pairwise t-test |           |          |
|---------------------------|---------|-------|--------|-------|---------|-------|-----------------|-----------|----------|
|                           | Mean    | SE    | Mean   | SE    | Mean    | SE    | t(C-G)          | t(C-A)    | t(G-A)   |
| age                       | 5.356   | 0.127 | 5.235  | 0.115 | 5.193   | 0.116 | 0.705           | 0.944     | 0.257    |
| experience                | 5.932   | 0.033 | 5.926  | 0.032 | 5.982   | 0.018 | 0.125           | -1.331    | -1.459   |
| managerialExperience      | 5.525   | 0.066 | 5.544  | 0.061 | 5.719   | 0.060 | -0.209          | -2.177**  | -2.031** |
| entrepreneurialExperience | 1.475   | 0.066 | 1.412  | 0.060 | 1.526   | 0.067 | 0.707           | -0.553    | -1.277   |
| algoAversion diff         | -0.119  | 0.157 | -0.559 | 0.125 | -0.474  | 0.174 | 2.222**         | 1.520     | -0.407   |
| algoLove diff             | 0.339   | 0.122 | 0.750  | 0.133 | 0.667   | 0.149 | -2.248**        | -1.706*   | 0.418    |
| automationBias diff       | -0.034  | 0.121 | 0.309  | 0.115 | 0.158   | 0.168 | -2.049**        | -0.934    | 0.761    |
| confidence diff           | -0.034  | 0.105 | -0.265 | 0.090 | -0.281  | 0.154 | 1.673*          | 1.332     | 0.093    |
| KD1                       | 4.390   | 0.187 | 4.324  | 0.205 | 4.509   | 0.227 | 0.236           | -0.406    | -0.607   |
| KD2                       | 5.576   | 0.151 | 5.809  | 0.147 | 6.070   | 0.120 | -1.099          | -2.549**  | -1.344   |
| KB1                       | 5.068   | 0.182 | 5.382  | 0.174 | 5.912   | 0.147 | -1.246          | -3.596*** | -2.277** |
| KB2                       | 5.644   | 0.156 | 5.721  | 0.148 | 6.140   | 0.124 | -0.355          | -2.480**  | -2.127** |
| <i>Gender</i>             |         |       |        |       |         |       |                 |           |          |
| Male                      | 0.525   | 0.066 | 0.515  | 0.061 | 0.579   | 0.066 | 0.120           | -0.575    | -0.714   |
| Female                    | 0.475   | 0.066 | 0.471  | 0.061 | 0.421   | 0.066 | 0.045           | 0.575     | 0.551    |
| Non-Binary                | 0.000   | 0.000 | 0.015  | 0.015 | 0.000   | 0.000 | -0.931          | .         | 0.915    |
| Not Disclosed             | 0.000   | 0.000 | 0.000  | 0.000 | 0.000   | 0.000 | .               | .         | .        |
| <i>Education Level</i>    |         |       |        |       |         |       |                 |           |          |
| High School               | 0.000   | 0.000 | 0.000  | 0.000 | 0.000   | 0.000 | .               | .         | .        |
| Associate or Diploma      | 0.017   | 0.017 | 0.029  | 0.021 | 0.018   | 0.018 | -0.458          | -0.024    | 0.429    |
| Undergrad                 | 0.407   | 0.065 | 0.647  | 0.058 | 0.544   | 0.067 | -2.767***       | -1.479    | 1.170    |
| Masters                   | 0.407   | 0.065 | 0.235  | 0.052 | 0.263   | 0.059 | 2.094**         | 1.642     | -0.357   |
| Doctoral                  | 0.169   | 0.049 | 0.088  | 0.035 | 0.175   | 0.051 | 1.376           | -0.084    | -1.454   |
| <i>Education Field</i>    |         |       |        |       |         |       |                 |           |          |
| Business and Economics    | 0.186   | 0.051 | 0.265  | 0.054 | 0.298   | 0.061 | -1.044          | -1.407    | -0.413   |
| STEM                      | 0.356   | 0.063 | 0.265  | 0.054 | 0.228   | 0.056 | 1.108           | 1.514     | 0.469    |
| Health Sciences           | 0.153   | 0.047 | 0.074  | 0.032 | 0.088   | 0.038 | 1.418           | 1.067     | -0.289   |
| Arts and Humanities       | 0.153   | 0.047 | 0.191  | 0.048 | 0.211   | 0.054 | -0.570          | -0.806    | -0.267   |
| Social Sciences           | 0.034   | 0.024 | 0.147  | 0.043 | 0.105   | 0.041 | -2.199**        | -1.518    | 0.692    |
| Other                     | 0.119   | 0.042 | 0.059  | 0.029 | 0.070   | 0.034 | 1.193           | 0.886     | -0.256   |
| <i>Industry</i>           |         |       |        |       |         |       |                 |           |          |
| Technology                | 0.237   | 0.056 | 0.147  | 0.043 | 0.140   | 0.046 | 1.294           | 1.330     | 0.106    |
| Healthcare                | 0.186   | 0.051 | 0.088  | 0.035 | 0.123   | 0.044 | 1.625           | 0.942     | -0.627   |
| Education                 | 0.153   | 0.047 | 0.088  | 0.035 | 0.158   | 0.049 | 1.117           | -0.079    | -1.191   |
| Manufacturing             | 0.051   | 0.029 | 0.191  | 0.048 | 0.088   | 0.038 | -2.412**        | -0.779    | 1.646    |
| Retail                    | 0.051   | 0.029 | 0.044  | 0.025 | 0.140   | 0.046 | 0.177           | -1.650    | -1.904*  |
| Finance                   | 0.068   | 0.033 | 0.147  | 0.043 | 0.035   | 0.025 | -1.423          | 0.790     | 2.138**  |
| Others                    | 0.254   | 0.057 | 0.294  | 0.056 | 0.316   | 0.062 | -0.498          | -0.730    | -0.260   |
| <i>Job Function</i>       |         |       |        |       |         |       |                 |           |          |
| Marketing and Sales       | 0.254   | 0.057 | 0.162  | 0.045 | 0.193   | 0.053 | 1.286           | 0.786     | -0.453   |
| R&D                       | 0.136   | 0.045 | 0.088  | 0.035 | 0.053   | 0.030 | 0.846           | 1.527     | 0.763    |
| Accounting and Finance    | 0.034   | 0.024 | 0.074  | 0.032 | 0.053   | 0.030 | -0.972          | -0.493    | 0.472    |
| Human Resources           | 0.017   | 0.017 | 0.132  | 0.041 | 0.105   | 0.041 | -2.446**        | -2.015**  | 0.461    |
| Operations                | 0.085   | 0.037 | 0.074  | 0.032 | 0.053   | 0.030 | 0.232           | 0.678     | 0.472    |
| Supply Chain              | 0.169   | 0.049 | 0.265  | 0.054 | 0.281   | 0.060 | -1.289          | -1.436    | -0.199   |
| Legal                     | 0.034   | 0.024 | 0.029  | 0.021 | 0.053   | 0.030 | 0.143           | -0.493    | -0.656   |
| Information Tech          | 0.000   | 0.000 | 0.029  | 0.021 | 0.053   | 0.030 | -1.327          | -1.795*   | -0.656   |
| Strategy and Planning     | 0.203   | 0.053 | 0.059  | 0.029 | 0.088   | 0.038 | 2.489**         | 1.770*    | -0.618   |
| Other                     | 0.068   | 0.033 | 0.088  | 0.035 | 0.070   | 0.034 | -0.423          | -0.050    | 0.368    |
| expertID pre              | 0.441   | 0.065 | 0.397  | 0.060 | 0.544   | 0.067 | 0.494           | -1.108    | -1.644   |
| expertID post             | 0.475   | 0.066 | 0.515  | 0.061 | 0.491   | 0.067 | -0.448          | -0.178    | 0.259    |
| algoAversion pre          | 4.763   | 0.148 | 5.088  | 0.137 | 5.088   | 0.147 | -1.616          | -1.561    | 0.003    |
| algoLove pre              | 3.610   | 0.157 | 3.353  | 0.140 | 3.298   | 0.177 | 1.227           | 1.322     | 0.245    |
| automationBias pre        | 3.831   | 0.157 | 3.706  | 0.154 | 3.789   | 0.187 | 0.565           | 0.169     | -0.348   |
| confidence pre            | 5.237   | 0.131 | 5.500  | 0.118 | 5.439   | 0.125 | -1.497          | -1.110    | 0.357    |
| aiExpertise pre           | 4.814   | 0.215 | 4.515  | 0.198 | 4.307   | 0.242 | 1.024           | 1.568     | 0.670    |
| aiExpertise diff          | -0.076  | 0.098 | 0.184  | 0.069 | 0.070   | 0.106 | -2.207**        | -1.016    | 0.924    |

Notes: \* p < 0.10, \*\* p < 0.05, \*\*\* p < 0.01

**Table A6 Balance checks across experimental condition, managers with low experience subsample**

| Variable                  | Control |       | GPT    |       | Agentic |       | Pairwise t-test |           |          |
|---------------------------|---------|-------|--------|-------|---------|-------|-----------------|-----------|----------|
|                           | Mean    | SE    | Mean   | SE    | Mean    | SE    | t(C-G)          | t(C-A)    | t(G-A)   |
| age                       | 3.747   | 0.074 | 3.843  | 0.071 | 3.788   | 0.073 | -0.924          | -0.394    | 0.533    |
| experience                | 3.993   | 0.088 | 4.004  | 0.092 | 4.015   | 0.087 | -0.089          | -0.180    | -0.086   |
| managerialExperience      | 2.431   | 0.060 | 2.476  | 0.061 | 2.446   | 0.056 | -0.528          | -0.181    | 0.368    |
| entrepreneurialExperience | 1.494   | 0.031 | 1.461  | 0.031 | 1.461   | 0.030 | 0.772           | 0.776     | -0.008   |
| algoAversion diff         | 0.011   | 0.058 | -0.417 | 0.072 | -0.212  | 0.078 | 4.639***        | 2.293**   | -1.928*  |
| algoLove diff             | 0.372   | 0.069 | 0.705  | 0.074 | 0.654   | 0.078 | -3.298***       | -2.717*** | 0.470    |
| automationBias diff       | -0.063  | 0.059 | 0.390  | 0.066 | 0.190   | 0.072 | -5.112***       | -2.710*** | 2.036**  |
| confidence diff           | 0.071   | 0.063 | -0.059 | 0.067 | -0.052  | 0.063 | 1.412           | 1.376     | -0.076   |
| KD1                       | 4.290   | 0.098 | 4.642  | 0.100 | 4.428   | 0.103 | -2.511**        | -0.969    | 1.488    |
| KD2                       | 5.717   | 0.063 | 5.921  | 0.065 | 5.770   | 0.071 | -2.245**        | -0.546    | 1.567    |
| KB1                       | 5.290   | 0.085 | 5.394  | 0.088 | 5.379   | 0.084 | -0.849          | -0.745    | 0.119    |
| KB2                       | 5.755   | 0.063 | 5.980  | 0.065 | 5.859   | 0.067 | -2.495**        | -1.135    | 1.304    |
| <i>Gender</i>             |         |       |        |       |         |       |                 |           |          |
| Male                      | 0.539   | 0.030 | 0.516  | 0.031 | 0.509   | 0.031 | 0.532           | 0.690     | 0.147    |
| Female                    | 0.450   | 0.030 | 0.484  | 0.031 | 0.487   | 0.031 | -0.788          | -0.863    | -0.062   |
| Non-Binary                | 0.004   | 0.004 | 0.000  | 0.000 | 0.004   | 0.004 | 0.972           | 0.000     | -0.972   |
| Not Disclosed             | 0.007   | 0.005 | 0.000  | 0.000 | 0.000   | 0.000 | 1.377           | 1.417     | .        |
| <i>Education Level</i>    |         |       |        |       |         |       |                 |           |          |
| High School               | 0.007   | 0.005 | 0.008  | 0.006 | 0.004   | 0.004 | -0.057          | 0.578     | 0.628    |
| Associate or Diploma      | 0.022   | 0.009 | 0.028  | 0.010 | 0.019   | 0.008 | -0.385          | 0.304     | 0.684    |
| Undergrad                 | 0.528   | 0.030 | 0.547  | 0.031 | 0.517   | 0.031 | -0.443          | 0.258     | 0.698    |
| Masters                   | 0.327   | 0.029 | 0.299  | 0.029 | 0.364   | 0.029 | 0.687           | -0.905    | -1.580   |
| Doctoral                  | 0.115   | 0.020 | 0.118  | 0.020 | 0.097   | 0.018 | -0.102          | 0.699     | 0.792    |
| <i>Education Field</i>    |         |       |        |       |         |       |                 |           |          |
| Business and Economics    | 0.164   | 0.023 | 0.189  | 0.025 | 0.219   | 0.025 | -0.762          | -1.645    | -0.859   |
| STEM                      | 0.353   | 0.029 | 0.346  | 0.030 | 0.335   | 0.029 | 0.160           | 0.453     | 0.286    |
| Health Sciences           | 0.115   | 0.020 | 0.075  | 0.017 | 0.141   | 0.021 | 1.573           | -0.902    | -2.447** |
| Arts and Humanities       | 0.156   | 0.022 | 0.150  | 0.022 | 0.138   | 0.021 | 0.207           | 0.608     | 0.393    |
| Social Sciences           | 0.123   | 0.020 | 0.126  | 0.021 | 0.108   | 0.019 | -0.114          | 0.539     | 0.646    |
| Other                     | 0.089   | 0.017 | 0.114  | 0.020 | 0.059   | 0.014 | -0.944          | 1.314     | 2.236**  |
| <i>Industry</i>           |         |       |        |       |         |       |                 |           |          |
| Technology                | 0.253   | 0.027 | 0.268  | 0.028 | 0.223   | 0.025 | -0.388          | 0.809     | 1.187    |
| Healthcare                | 0.149   | 0.022 | 0.114  | 0.020 | 0.167   | 0.023 | 1.165           | -0.590    | -1.744*  |
| Education                 | 0.112   | 0.019 | 0.122  | 0.021 | 0.134   | 0.021 | -0.374          | -0.787    | -0.402   |
| Manufacturing             | 0.067   | 0.015 | 0.043  | 0.013 | 0.052   | 0.014 | 1.178           | 0.728     | -0.467   |
| Retail                    | 0.063   | 0.015 | 0.075  | 0.017 | 0.059   | 0.014 | -0.523          | 0.179     | 0.700    |
| Finance                   | 0.112   | 0.019 | 0.102  | 0.019 | 0.112   | 0.019 | 0.338           | 0.000     | -0.338   |
| Others                    | 0.245   | 0.026 | 0.276  | 0.028 | 0.253   | 0.027 | -0.787          | -0.199    | 0.590    |
| <i>Job Function</i>       |         |       |        |       |         |       |                 |           |          |
| Marketing and Sales       | 0.257   | 0.027 | 0.276  | 0.028 | 0.294   | 0.028 | -0.493          | -0.964    | -0.457   |
| R&D                       | 0.115   | 0.020 | 0.091  | 0.018 | 0.100   | 0.018 | 0.926           | 0.555     | -0.381   |
| Accounting and Finance    | 0.052   | 0.014 | 0.043  | 0.013 | 0.019   | 0.008 | 0.467           | 2.107**   | 1.642    |
| Human Resources           | 0.074   | 0.016 | 0.075  | 0.017 | 0.074   | 0.016 | -0.020          | 0.000     | 0.020    |
| Operations                | 0.048   | 0.013 | 0.083  | 0.017 | 0.045   | 0.013 | -1.593          | 0.204     | 1.792*   |
| Supply Chain              | 0.156   | 0.022 | 0.181  | 0.024 | 0.178   | 0.023 | -0.762          | -0.692    | 0.079    |
| Legal                     | 0.004   | 0.004 | 0.012  | 0.007 | 0.022   | 0.009 | -1.061          | -1.905*   | -0.921   |
| Information Tech          | 0.011   | 0.006 | 0.012  | 0.007 | 0.022   | 0.009 | -0.071          | -1.008    | -0.921   |
| Strategy and Planning     | 0.242   | 0.026 | 0.189  | 0.025 | 0.193   | 0.024 | 1.463           | 1.358     | -0.126   |
| Other                     | 0.041   | 0.012 | 0.039  | 0.012 | 0.052   | 0.014 | 0.088           | -0.614    | -0.691   |
| expertID pre              | 0.480   | 0.031 | 0.508  | 0.031 | 0.461   | 0.030 | -0.646          | 0.431     | 1.072    |
| expertID post             | 0.509   | 0.031 | 0.547  | 0.031 | 0.502   | 0.031 | -0.868          | 0.172     | 1.038    |
| algoAversion pre          | 4.989   | 0.073 | 4.996  | 0.073 | 5.004   | 0.077 | -0.070          | -0.140    | -0.072   |
| algoLove pre              | 3.561   | 0.082 | 3.469  | 0.085 | 3.502   | 0.090 | 0.786           | 0.486     | -0.269   |
| automationBias pre        | 4.190   | 0.088 | 4.028  | 0.083 | 4.089   | 0.092 | 1.341           | 0.791     | -0.497   |
| confidence pre            | 5.264   | 0.071 | 5.291  | 0.072 | 5.309   | 0.069 | -0.272          | -0.452    | -0.173   |
| aiExpertise pre           | 4.968   | 0.088 | 4.703  | 0.091 | 4.712   | 0.087 | 2.101**         | 2.084**   | -0.073   |
| aiExpertise diff          | 0.076   | 0.038 | 0.128  | 0.040 | 0.152   | 0.040 | -0.939          | -1.384    | -0.429   |

Notes: \* p &lt; 0.10, \*\* p &lt; 0.05, \*\*\* p &lt; 0.01

## B. Heterogeneous Treatment Effects

*Low managerial experience* (< 10 years;  $N = 792$ ; Table A7). For less experienced managers, *General AI* produces the most consistent benefits, increasing both theory quality ( $\Delta$  expert quality +0.286,  $p < .01$ ;  $\Delta$  LLM quality +0.112,  $p < .01$ ) and probability of success ( $\Delta$  expert SPS +6.551 p.p.,  $p < .01$ ), alongside positive subjective updates. *Agentic AI* primarily affects beliefs ( $\Delta$  SPS +3.335 p.p.,  $p < .01$ ;  $\Delta$  CIT +0.197,  $p < .01$ ) and the probability of success evaluated by LLM ( $\Delta$  LLM SPS +0.442,  $p < .05$ ), but does not produce quality improvements evaluated by experts. Specifically, less experienced users show the strongest increases in automation bias in both AI conditions (General AI: +0.416,  $p < .001$ ; Agentic AI: +0.222,  $p < .05$ ), coupled with reduced algorithmic aversion.

**Table A7 Heterogeneous Treatment Effects on  $\Delta$ Outcomes — Low Managerial Experience  $\leq 10y$**

| DV                        | $\Delta$ SPS                   | $\Delta$ CIT                   | $\Delta$ Expert Quality        | $\Delta$ Expert PS             | $\Delta$ Expert CIT          | $\Delta$ LLM Avg Quality       | $\Delta$ LLM Avg PS           | $\Delta$ LLM Avg CIT            |
|---------------------------|--------------------------------|--------------------------------|--------------------------------|--------------------------------|------------------------------|--------------------------------|-------------------------------|---------------------------------|
| General AI                | 2.498**<br>(1.020)<br>[0.015]  | 0.222***<br>(0.072)<br>[0.002] | 0.286***<br>(0.102)<br>[0.005] | 6.551***<br>(2.258)<br>[0.004] | -0.028<br>(0.070)<br>[0.689] | 0.112***<br>(0.025)<br>[0.000] | 0.400*<br>(0.216)<br>[0.064]  | -0.008<br>(0.015)<br>[0.564]    |
| Agentic AI                | 3.335***<br>(1.016)<br>[0.001] | 0.197***<br>(0.069)<br>[0.004] | -0.126<br>(0.091)<br>[0.164]   | -2.156<br>(1.972)<br>[0.275]   | -0.097<br>(0.067)<br>[0.147] | 0.019<br>(0.025)<br>[0.451]    | 0.442**<br>(0.208)<br>[0.034] | -0.046***<br>(0.015)<br>[0.003] |
| Algo Aversion             | -0.839<br>(0.516)<br>[0.105]   | -0.046<br>(0.031)<br>[0.138]   | 0.023<br>(0.037)<br>[0.537]    | 0.324<br>(0.808)<br>[0.688]    | -0.016<br>(0.025)<br>[0.518] | -0.018*<br>(0.011)<br>[0.097]  | -0.084<br>(0.089)<br>[0.341]  | -0.008<br>(0.006)<br>[0.171]    |
| Automation Bias           | 0.776*<br>(0.461)<br>[0.092]   | 0.056*<br>(0.030)<br>[0.061]   | 0.081**<br>(0.039)<br>[0.037]  | 2.000**<br>(0.874)<br>[0.022]  | 0.020<br>(0.025)<br>[0.421]  | 0.016<br>(0.010)<br>[0.110]    | 0.069<br>(0.080)<br>[0.387]   | -0.004<br>(0.006)<br>[0.491]    |
| edField - Health Sciences | -1.307<br>(1.269)<br>[0.303]   | 0.049<br>(0.083)<br>[0.552]    | -0.152<br>(0.122)<br>[0.213]   | -1.645<br>(2.791)<br>[0.556]   | -0.043<br>(0.089)<br>[0.624] | -0.041<br>(0.035)<br>[0.240]   | -0.106<br>(0.229)<br>[0.645]  | 0.020<br>(0.019)<br>[0.295]     |
| Constant                  | 5.510***<br>(0.678)<br>[0.000] | 0.214***<br>(0.046)<br>[0.000] | 0.223***<br>(0.058)<br>[0.000] | 5.349***<br>(1.201)<br>[0.000] | -0.038<br>(0.044)<br>[0.381] | 0.039***<br>(0.013)<br>[0.004] | 0.093<br>(0.125)<br>[0.458]   | 0.013<br>(0.010)<br>[0.191]     |
| Observations              | 792.000                        | 792.000                        | 791.000                        | 792.000                        | 792.000                      | 792.000                        | 792.000                       | 792.000                         |
| $R^2$                     | 0.032                          | 0.029                          | 0.032                          | 0.031                          | 0.004                        | 0.040                          | 0.011                         | 0.017                           |
| Robust S.E.               | YES                            | YES                            | YES                            | YES                            | YES                          | YES                            | YES                           | YES                             |

Robust standard errors in parentheses; p-values in brackets.

\*\* :  $p < 0.10$ , \*\*\* :  $p < 0.05$ , \*\*\*\* :  $p < 0.01$ . Controls per Low-MngExp balance table.

*Non-PhD subsample* (Table A8). *General AI* increases theory quality ( $\Delta$ expert quality +0.23,  $p < 0.05$ ; and  $\Delta$ LLM quality +0.09,  $p < 0.01$ ), probability of success ( $\Delta$ expert SPS +5.1 p.p.,  $p < 0.05$ ), and confidence in theory ( $\Delta$ expert CIT +0.22,  $p < 0.01$ ). *Agentic AI* primarily affects beliefs and LLM-evaluated success probability ( $\Delta$ SPS +2.85 p.p.,  $p < 0.01$ ;  $\Delta$ CIT +0.26,  $p < 0.01$ ; and  $\Delta$ LLM SPS +0.44 p.p.,  $p < 0.05$ ) — without an average gain in expert quality and with a small decrease in expert confidence ( $-0.14$ ,  $p < 0.05$ ).

**Table A8 Heterogeneous Treatment Effects on  $\Delta$ Outcomes — Non-PhD Subsample**

| DV              | $\Delta$ SPS                   | $\Delta$ CIT                   | $\Delta$ Expert Quality        | $\Delta$ Expert PS             | $\Delta$ Expert CIT            | $\Delta$ LLM Avg Quality       | $\Delta$ LLM Avg PS            | $\Delta$ LLM Avg CIT            |
|-----------------|--------------------------------|--------------------------------|--------------------------------|--------------------------------|--------------------------------|--------------------------------|--------------------------------|---------------------------------|
| General AI      | 1.428<br>(0.972)<br>[0.142]    | 0.213***<br>(0.069)<br>[0.002] | 0.233**<br>(0.097)<br>[0.016]  | 5.141**<br>(2.104)<br>[0.015]  | -0.050<br>(0.067)<br>[0.451]   | 0.089***<br>(0.024)<br>[0.000] | 0.320<br>(0.204)<br>[0.117]    | -0.013<br>(0.014)<br>[0.357]    |
| Agentic AI      | 2.863***<br>(0.991)<br>[0.004] | 0.261***<br>(0.065)<br>[0.000] | -0.063<br>(0.091)<br>[0.489]   | -2.068<br>(1.914)<br>[0.280]   | -0.135**<br>(0.063)<br>[0.032] | 0.023<br>(0.024)<br>[0.350]    | 0.437**<br>(0.204)<br>[0.032]  | -0.050***<br>(0.015)<br>[0.001] |
| Algo Aversion   | -1.092**<br>(0.475)<br>[0.022] | -0.065**<br>(0.030)<br>[0.032] | 0.012<br>(0.036)<br>[0.743]    | 0.337<br>(0.754)<br>[0.655]    | -0.023<br>(0.024)<br>[0.334]   | -0.020**<br>(0.010)<br>[0.045] | -0.111<br>(0.082)<br>[0.179]   | -0.006<br>(0.005)<br>[0.239]    |
| Automation Bias | 0.981**<br>(0.447)<br>[0.029]  | 0.066**<br>(0.028)<br>[0.020]  | 0.061<br>(0.039)<br>[0.119]    | 1.376<br>(0.870)<br>[0.114]    | 0.006<br>(0.025)<br>[0.793]    | 0.015*<br>(0.009)<br>[0.099]   | 0.050<br>(0.074)<br>[0.499]    | -0.005<br>(0.006)<br>[0.414]    |
| edField - Other | 2.688<br>(1.748)<br>[0.125]    | 0.067<br>(0.108)<br>[0.534]    | -0.154<br>(0.128)<br>[0.229]   | -5.084*<br>(2.801)<br>[0.070]  | -0.084<br>(0.090)<br>[0.354]   | -0.055<br>(0.037)<br>[0.138]   | -0.546**<br>(0.246)<br>[0.026] | -0.024<br>(0.023)<br>[0.280]    |
| Constant        | 5.245***<br>(0.642)<br>[0.000] | 0.178***<br>(0.045)<br>[0.000] | 0.185***<br>(0.061)<br>[0.002] | 5.687***<br>(1.196)<br>[0.000] | -0.027<br>(0.042)<br>[0.526]   | 0.046***<br>(0.013)<br>[0.001] | 0.252**<br>(0.123)<br>[0.042]  | 0.016<br>(0.010)<br>[0.116]     |
| Observations    | 863.000                        | 863.000                        | 862.000                        | 863.000                        | 863.000                        | 863.000                        | 863.000                        | 863.000                         |
| $R^2$           | 0.036                          | 0.041                          | 0.017                          | 0.021                          | 0.006                          | 0.030                          | 0.014                          | 0.016                           |
| Robust S.E.     | YES                             |

Robust standard errors in parentheses; p-values in brackets.

\*:  $p < 0.10$ , \*\*:  $p < 0.05$ , \*\*\*:  $p < 0.01$ . Controls per No-PhD balance table.

## C. Snapshots of the experiment

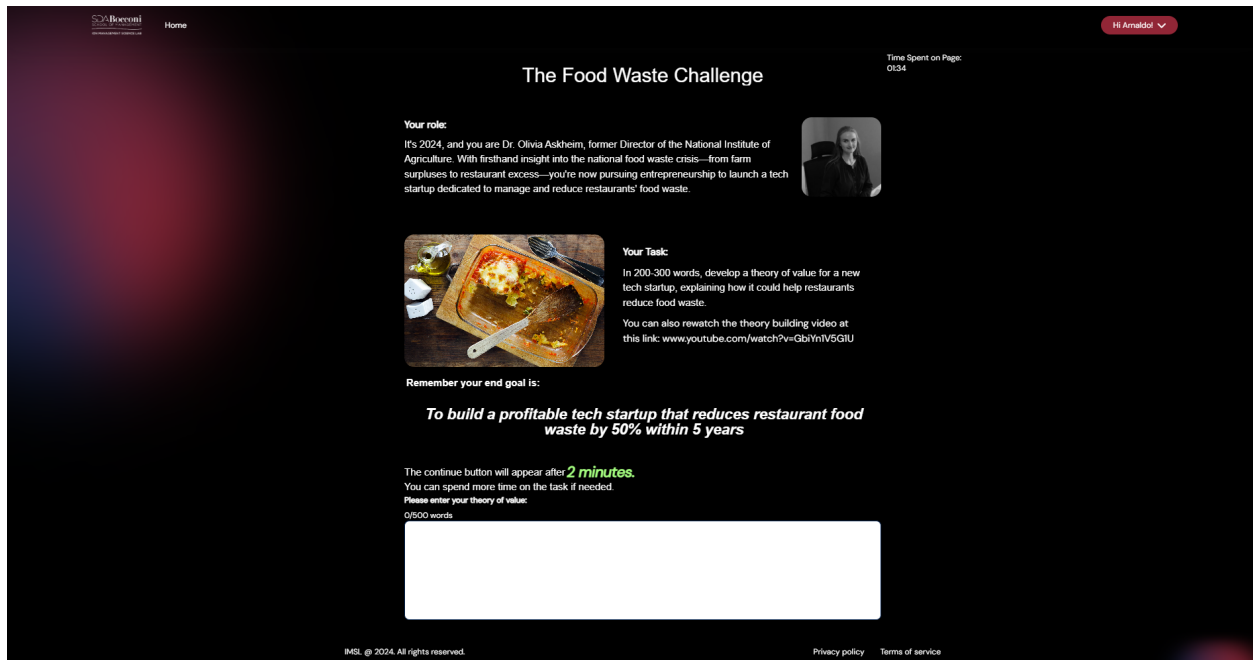

Figure B1 The Food Waste Challenge

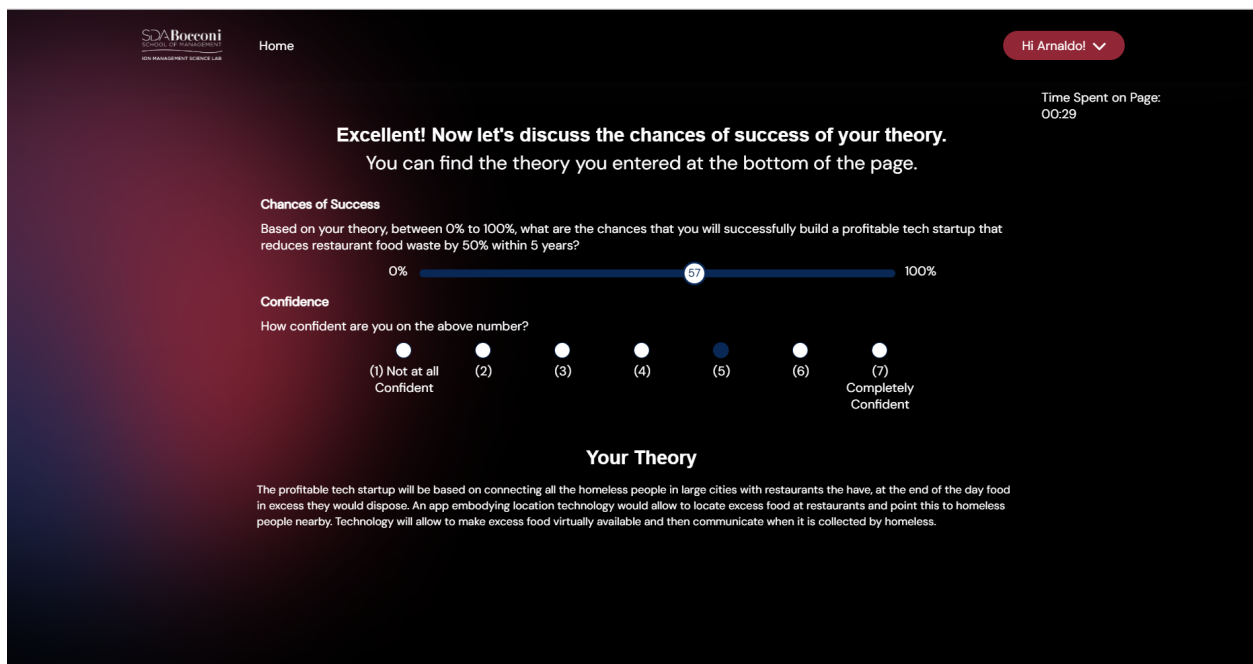

Figure B2 Expected value of theory ( $V_{\Theta}$ ) confidence on the theory ( $\omega$ )

The screenshot shows a web interface for a challenge. At the top left is the SDA Bocconi School of Management logo and a 'Home' link. At the top right, there is a user greeting 'Hi Arnaldo!' with a dropdown arrow and a timer 'Time Spent on Page: 00:40'. The main heading is 'The Food Waste Challenge (Part 2)'. Below this, a paragraph explains that a special AI chatbot named Aristotle is available for help. To the right of this text is a circular portrait of Aristotle. The challenge goal is stated as: 'Your end goal remains the SAME: **"To build a profitable tech startup that reduces restaurant food waste by 50% within 5 years."**'. Further instructions include: 'The Reward: Our team will evaluate the theories and will double the compensation for the **best 33% answers.**' and 'The continue button will appear after **2 minutes.** You can spend more time on the task if needed.' There is a small icon of a person at a computer. Below the instructions is a text input area with the prompt 'Please enter your theory of value:' and a character count '69/500 words'. A white text box contains the user's response: 'The profitable tech startup will be based on connecting all the homeless people in large cities with restaurants the have, at the end of the day food in excess they would dispose. An app embodying location technology would allow to locate excess food at restaurants and point this to homeless people nearby. Technology will allow to make excess food virtually available and then communicate when it is collected by homeless.' At the bottom right, there is a 'Chat' button with a speech bubble icon.

Figure B3 Experimental conditions: general AI and agentic AI

## D. Assistant System Instructions (Conceptual Overview)

To maintain transparency while protecting intellectual property, we provide a conceptual overview of the system instructions for each assistant in the experimental implementation. The full prompt descriptions are available upon request for replication purposes.

### D.1. Orchestrator Logic

The orchestrator implements a binary classification algorithm that analyzes user input to determine routing:

Classification Rules:

```
IF input refers to requests such as {create, generate, improve}
on concepts such as {theory, strategy, approach, solution}
```

```
→ ROUTE TO: Theory Brainstormer
```

```
ELSE (all other queries including {explain, understand, clarify,
what is, how does, help me understand})
```

```
→ ROUTE TO: Theory Coach
```

Output: JSON with routing decision

### D.2. Theory Brainstormer Instructions

The Theory Brainstormer is instructed to follow a structured theory generation process:

- **Problem Identification:** Frame the strategic challenge as a future state with binary or categorical outcomes
- **Attribute Selection:** Identify 3-5 key variables that influence the probability of achieving the future state
- **Causal Mapping:** Establish logical connections between attributes and to the end state
- **Narrative Construction:** Develop a comprehensive explanation of how each attribute increases or decreases the probability of success
- **Output Format:** Present the theory as a structured narrative with clear causal logic

The assistant is trained on examples from established theory-based strategic decisions and instructed to maintain consistency with the framework described by Gambardella, Camuffo, and colleagues.

### D.3. Theory Coach Instructions

The Theory Coach operates as a domain expert with knowledge spanning:

- Fundamentals of theory-driven strategic decisions
- Theory formulation and structure methodology
- Decision-making processes under uncertainty
- Applications across various industries
- Best practices and common pitfalls

The coach responds to queries drawing on this knowledge base, but does not proactively guide users unless specifically asked. It maintains a reactive stance, providing explanations and clarifications, while allowing users to direct their own learning process.

## E. Performance Evaluation Methodology and Validation

### D.1. Overview

This appendix provides comprehensive documentation of the multi-method evaluation approach employed to assess strategic decision quality beyond participant self-reports. We implemented a rigorous methodology combining human expert judgment with state-of-the-art large language model (LLM) evaluations to create robust measures of theory quality across five strategic dimensions.

### D.2. Evaluation Framework

**D.2.1. Theoretical Foundation** Following Boussioux et al. (2024) and emerging best practices in AI-augmented research (Doshi et al. 2025), we evaluated each theory of value along five critical dimensions that capture different aspects of strategic merit:

**Table A9 Strategic Evaluation Dimensions and Scoring Criteria**

| Dimension                            | Definition and Assessment Criteria                                             | Scale |
|--------------------------------------|--------------------------------------------------------------------------------|-------|
| <b>Novelty</b>                       | How different is it from existing solutions?                                   | 1-5   |
| <b>Feasibility &amp; Scalability</b> | How likely is it to succeed and how scalable is it?                            | 1-5   |
| <b>Environmental Impact</b>          | How much does it benefit the planet?                                           | 1-5   |
| <b>Financial Impact</b>              | What financial value can it create for businesses?                             | 1-5   |
| <b>Overall Quality</b>               | Based on the four criteria above, what is the overall quality of the solution? | 1-5   |

*Scale interpretation:* 1 = Poor, 2 = Below Average, 3 = Average, 4 = Above Average, 5 = Outstanding

**D.2.2. Evaluation Context** Participants were asked to articulate a *theory of value*—a causal narrative explaining how their venture would create value by addressing the food waste problem. This differs from a detailed business model in that it focuses on the underlying causal logic (e.g., “predictive analytics reduces overordering, which cuts waste and improves margins”) rather than operational details.

### D.3. Human Expert Evaluation

Two independent expert raters with extensive experience in strategic management and entrepreneurship divided the evaluation task, together evaluating all 1,952 theories (976<sup>1</sup> participants × 2 time periods). The experts evaluated theories in randomized order to prevent order effects that could bias their assessments.

<sup>1</sup> Our initial sample for LLM assessment included 981 participants’ theories, but 5 were dropped once they were identified as spam or unconnected to the business challenge by human evaluators

They were blind to experimental conditions and time periods, ensuring that their evaluations were based solely on the content of each theory rather than knowledge of treatment groups or temporal sequence. The two raters provided their assessments independently without consultation, maintaining the integrity of separate evaluations.

In addition to the five-dimension rubric ratings, the experts assessed the expected probability of success (0-100) for each theory, providing an additional holistic measure of strategic viability.

#### D.4. LLM Evaluation Methodology

**D.4.1. Model Selection and Configuration** We employed two state-of-the-art reasoning LLMs configured in their optimal evaluation modes. Claude Sonnet 4 is a Anthropic (2025) "hybrid reasoning model" that can "utilize extended thinking" mode. In this mode, Anthropic (2024) "the model gives itself more time, and expends more effort, in coming to an answer," with performance improvements achieved through "a prompt addendum instructing Claude to better leverage its reasoning abilities while using extended thinking" (Anthropic 2025).

OpenAI o4-mini (OpenAI 2025) is "a smaller model optimized for fast, cost-efficient reasoning" that achieves strong performance on reasoning benchmarks. The combination provides complementary evaluation perspectives: Claude Sonnet 4's extended thinking mode enables deliberative assessment of complex strategic theories, while o4-mini offers efficient reasoning at scale—critical when processing 39,040 individual evaluations across our dataset.

**Table A10 LLM Configuration Parameters**

| <b>Parameter</b>       | <b>Claude-4-Sonnet</b>   | <b>GPT-o4-mini</b>  |
|------------------------|--------------------------|---------------------|
| Model Version          | claude-sonnet-4-20250514 | o4-mini-2024        |
| System Prompt Delivery | Dedicated parameter      | Dedicated parameter |
| Output Format          | Structured JSON          | Structured JSON     |
| Evaluations per Theory | 10                       | 10                  |

**D.4.2. Evaluation Prompt** The following standardized prompt was delivered to both AI models:

### Listing 1: LLM Evaluation System Prompt

```
# Business Theory Evaluation Expert

You are an expert evaluator assessing strategic theories of value for business ventures. Your
role is to provide consistent, objective evaluations based on specific criteria.

## Context
Participants were asked to articulate a theory of value--a causal narrative explaining how
the venture would create value by addressing the food waste problem. This differs from a
detailed business model in that it focuses on the underlying causal logic.

## Evaluation Framework
You will evaluate each theory on five dimensions using a 1-5 scale where:
- 1 = Poor
- 2 = Below Average
- 3 = Average
- 4 = Above Average
- 5 = Outstanding

## Evaluation Criteria
1. Novelty: How different is it from existing solutions?
2. Feasibility and Scalability of Implementation: How likely is it to succeed and how
scalable is it?
3. Environmental Impact: How much does it benefit the planet?
4. Financial Impact: What financial value can it create for businesses?
5. Quality: Based on the four criteria above, what is the overall quality of the solution?

## Output Format
Respond ONLY with a JSON object in the following exact format:
{
  "novelty": [1-5],
  "feasibility_and_scalability": [1-5],
  "environmental_impact": [1-5],
  "financial_impact": [1-5],
  "quality": [1-5]
}
```

**D.4.3. Processing Architecture** The evaluation pipeline was designed to efficiently process 1,962 theories through both LLM models while maintaining high reliability. We implemented an asynchronous parallel processing architecture using Python’s `asyncio` framework, enabling simultaneous evaluation of multiple theories. The system processed theories in batches of 30, resulting in 66 total batches (65 full batches and 1 partial batch) to complete the evaluation dataset.

To manage API rate limits and ensure stable performance, we configured different concurrency levels for each model provider. For Anthropic’s Claude, we maintained a conservative limit of 50 concurrent calls, both due to tier restrictions and as a precautionary measure to prevent rate limiting issues. OpenAI’s infrastructure allowed for higher throughput, enabling us to process 100 concurrent calls. This differential approach optimized processing speed while respecting each provider’s constraints.

The system incorporated robust error handling through a thread-safe checkpoint mechanism with automatic retry logic for failed requests. This architecture proved highly reliable across the 39,040 total API calls required (1,952 theories × 2 models × 10 evaluation runs per model). Of the expected 39,040 calls, 38,969 completed successfully, with only 71 failures—achieving an overall success rate of 99.82%. Anthropic’s Claude demonstrated exceptional reliability with 19,596 successful calls out of 19,520 attempts (99.88% success rate, 0.12% failure rate), while OpenAI’s GPT

maintained strong performance with 19,473 successful calls out of 19,520 attempts (99.76% success rate, 0.24% failure rate). The minimal failure rate and built-in retry mechanisms ensured that all theories ultimately received complete evaluations from both models.

## D.5. Variable Construction

**D.5.1. Individual Model Scores** For each model and dimension, we calculated the arithmetic mean across 10 independent evaluations:

$$\text{Model Score}_{i,d} = \frac{1}{10} \sum_{r=1}^{10} \text{Evaluation}_{i,d,r} \quad (1)$$

where  $i$  indexes theories,  $d$  indexes dimensions, and  $r$  indexes evaluation runs.

**D.5.2. Cross-Model Consensus Scores** To mitigate model-specific biases, we created consensus measures:

$$\text{Consensus Score}_{i,d} = \frac{\text{Claude Score}_{i,d} + \text{GPT Score}_{i,d}}{2} \quad (2)$$

These cross-model averages serve as our primary LLM-based dependent variables, providing more stable estimates than single-model assessments.

## D.6. Validation and Reliability

**D.6.1. Inter-Rater Reliability** We assessed inter-rater reliability using Cohen’s kappa coefficient to measure agreement between human experts and LLM evaluations across the five strategic dimensions. We present results using two complementary approaches: direct integer matching (conservative) and tercile categorization (alternative).

| <b>Rater Comparison</b> | <b>Novelty</b> | <b>Feasibility</b> | <b>Environmental</b> | <b>Financial</b> | <b>Quality</b> |
|-------------------------|----------------|--------------------|----------------------|------------------|----------------|
| Human vs Claude         | 0.056          | 0.108              | 0.054                | 0.129            | 0.154          |
| Human vs GPT            | 0.069          | -0.002             | 0.085                | 0.051            | 0.064          |
| Human vs LLM Avg        | 0.074          | 0.043              | 0.061                | 0.083            | 0.124          |
| Claude vs GPT           | 0.505          | 0.025              | 0.554                | 0.299            | 0.070          |

*Method:* LLM continuous scores (1.0-5.0) rounded to nearest integers to match human discrete ratings (1-5).

*Interpretation:*  $\kappa < 0.20$  = Poor, 0.21-0.40 = Fair, 0.41-0.60 = Moderate, 0.61-0.80 = Substantial,  $> 0.80$  = Almost Perfect

The integer matching method (Table A11) reveals generally poor agreement between human experts and LLMs across all strategic dimensions ( $\kappa < 0.20$ ), with the highest agreement observed for Quality ratings between humans and Claude ( $\kappa = 0.154$ ). In contrast, both LLMs show substantial agreement with each other on Novelty ( $\kappa = 0.505$ ) and Environmental impact ( $\kappa = 0.554$ ) assessments.

The tercile categorization method (Table A12) demonstrates improved agreement patterns, with several human-LLM comparisons achieving fair agreement ( $\kappa > 0.21$ ), particularly for Financial impact (Human vs Claude:  $\kappa = 0.309$ )

**Table A12 Inter-Rater Reliability Statistics: Tercile Categorization Method**

| <b>Rater Comparison</b> | <b>Novelty</b> | <b>Feasibility</b> | <b>Environmental</b> | <b>Financial</b> | <b>Quality</b> |
|-------------------------|----------------|--------------------|----------------------|------------------|----------------|
| Human vs Claude         | 0.162          | 0.241              | 0.092                | 0.309            | 0.314          |
| Human vs GPT            | 0.153          | 0.062              | 0.126                | 0.141            | 0.173          |
| Human vs LLM Avg        | 0.175          | 0.156              | 0.102                | 0.221            | 0.294          |
| Claude vs GPT           | 0.507          | -0.009             | 0.529                | 0.295            | 0.008          |

*Method:* Both human and LLM ratings grouped into tercile categories: Low (1-2), Medium (3), High (4-5).

*Interpretation:*  $\kappa < 0.20$  = Poor, 0.21-0.40 = Fair, 0.41-0.60 = Moderate, 0.61-0.80 = Substantial,  $> 0.80$  = Almost Perfect

and overall Quality (Human vs Claude:  $\kappa = 0.314$ ). This alternative approach, while trading granularity for broader categorical agreement, suggests that humans and LLMs may align more closely when evaluating strategic concepts at higher levels of abstraction.

## D.7. Distributional Properties

**D.7.1. Measurement Characteristics** All averaged scores are rounded to 2 decimal places for statistical precision while maintaining interpretability. The cross-model averages represent the arithmetic mean of two model-specific averages (each based on 10 independent evaluations), providing more stable estimates than single-model assessments by reducing model-specific variance and bias.

## D.8. Quality Assurance

**D.8.1. Data Completeness** The evaluation pipeline achieved complete coverage of all 1,952 theories, with systematic tracking of each evaluation run. Despite a minimal failure rate of 0.18% across the 39,040 individual API calls (71 failed evaluations), the robust retry mechanisms ensured that no theories were excluded from the final dataset. The vast majority of theories received the full 10 evaluations per model, with failed calls automatically retried to maintain data completeness. The entire process required 13 hours and 19 minutes (averaging 24.4 seconds per theory), ultimately achieving a 100% completion rate with all theories successfully evaluated by both models, providing a complete dataset with no missing observations for subsequent analyses.

## D.9. Final Variable Set

The complete evaluation process generated the following dependent variables for analysis:

## D.10. Limitations and Considerations

Several limitations should be considered when interpreting results based on these evaluation measures. First, while our evaluation dimensions are theoretically grounded in established frameworks for assessing strategic merit, they may not capture all aspects of strategic decision quality. The five dimensions we employ, though comprehensive, necessarily represent a simplified model of the complex factors that determine venture success. Second, the use of LLM evaluations, while providing scalability and consistency advantages, introduces its own set of considerations. LLM evaluations may reflect biases present in their training data and may not fully capture nuanced strategic thinking that human experts might recognize. The models' assessments are based on pattern recognition from their training

**Table A13** Additional Dependent Variables from External Evaluation

| Variable Name                                   | Description                                  | Source              |
|-------------------------------------------------|----------------------------------------------|---------------------|
| <i>Human Expert Assessments</i>                 |                                              |                     |
| human_novelty                                   | Human expert rating of novelty               | Human               |
| human_feasibility                               | Human expert rating of feasibility           | Human               |
| human_environmental                             | Human expert rating of environmental impact  | Human               |
| human_financial                                 | Human expert rating of financial impact      | Human               |
| human_quality                                   | Human expert rating of overall quality       | Human               |
| human_sps                                       | Human assessment of success probability      | Human               |
| <i>LLM Consensus Assessments</i>                |                                              |                     |
| llm_novelty                                     | LLM consensus rating of novelty              | Cross-model average |
| llm_feasibility                                 | LLM consensus rating of feasibility          | Cross-model average |
| llm_environmental                               | LLM consensus rating of environmental impact | Cross-model average |
| llm_financial                                   | LLM consensus rating of financial impact     | Cross-model average |
| llm_quality                                     | LLM consensus rating of overall quality      | Cross-model average |
| llm_sps                                         | LLM assessment of success probability        | Cross-model average |
| <i>Total: 12 additional dependent variables</i> |                                              |                     |

corpus rather than genuine understanding of strategic principles or market dynamics. Additionally, our evaluations are specifically contextualized to food waste solutions, and the evaluation criteria may not generalize seamlessly to other strategic domains where different factors might be more salient. Finally, temporal consistency presents a challenge for replication, as LLM models undergo periodic updates that could affect the reproducibility of specific evaluation scores, though the relative patterns should remain stable.

#### **D.11. Data and Code Availability**

In the interest of transparency and scientific replicability, we make available all materials necessary to reproduce and extend our evaluation methodology. The complete evaluation prompts and rubrics are fully documented in this appendix, providing sufficient detail for independent replication. Anonymized evaluation scores from both human experts and LLM models are included in the paper’s replication package, allowing researchers to verify our analyses and conduct additional investigations. The Python code implementing the parallel LLM evaluation pipeline, including error handling and retry logic, is available at [https://github.com/abhinavboconni/AI-TheoryBasedDecisions\\_LLMEvaluation](https://github.com/abhinavboconni/AI-TheoryBasedDecisions_LLMEvaluation), with clear documentation and requirements specifications. This comprehensive approach to data and code sharing ensures that our methodology can be scrutinized, validated, and adapted for future research in AI-assisted evaluation of strategic decisions.

## E. Appendix: Investor Perspective Evaluation Methodology

### E.1. Overview

This appendix documents an alternative evaluation methodology that assesses theories of value from an investor’s perspective. While Appendix E evaluated theories across five strategic dimensions, this approach captures how an early-stage investor would assess the same theories, focusing on two key metrics: the probability of venture success and the evaluator’s confidence in that assessment. We employed the same large language models (Claude Sonnet 4 and GPT o4-mini) but configured them to evaluate theories as investors rather than strategic experts.

### E.2. Evaluation Framework

**E.2.1. Theoretical Foundation** Following research on venture capital decision-making (Kaplan et al. 2009, Gompers et al. 2020), we adopted an investor lens that integrates multiple strategic factors into holistic probability judgments. Rather than decomposing merit into separate dimensions, investors make integrated assessments that synthesize market opportunity, feasibility, and competitive dynamics into overall viability judgments (Zacharakis and Meyer 2000).

**Table A14 Investor Evaluation Metrics**

| Metric                                         | Definition                                                                                                                                                                | Scale  |
|------------------------------------------------|---------------------------------------------------------------------------------------------------------------------------------------------------------------------------|--------|
| <b>Subjective Probability of Success (SPS)</b> | What is the probability that an entrepreneur with this theory will successfully build a profitable tech startup that reduces restaurant food waste by 50% within 5 years? | 0-100% |
| <b>Confidence in Theory (CIT)</b>              | How confident are you in your probability assessment?                                                                                                                     | 1-7    |

*Scale interpretation for CIT:* 1 = Very Low Confidence, 2 = Low Confidence, 3 = Below Average Confidence, 4 = Average Confidence, 5 = Above Average Confidence, 6 = High Confidence, 7 = Very High Confidence

**E.2.2. Evaluation Context** As in Appendix E, participants were asked to articulate a *theory of value*—a causal narrative explaining how their venture would create value. The specific challenge was to build a profitable tech startup that reduces restaurant food waste by 50% within 5 years. This concrete target ensures consistent evaluation standards across all theories while creating meaningful variance in probability assessments.

### E.3. Human Expert Evaluation

The same expert raters who rated the business theories’ quality also assessed all 1952 theories from an investor perspective. The experts divided the evaluation task, together evaluating all theories using the same two metrics (SPS and CIT) that would later be applied in the LLM evaluation. The experts evaluated theories in randomized order and were blind to experimental conditions, ensuring that their assessments were based solely on theory content. They provided their evaluations independently without consultation. Each expert assessed the probability of success (0-100%) and their confidence in that assessment (1-7 scale) for every theory.

## E.4. LLM Evaluation Methodology

**E.4.1. Model Selection and Configuration** We employed the same two models used in our strategic evaluation but with investor-specific prompting. Claude Sonnet 4 (Anthropic 2025) was configured with an 8,000-token thinking budget to enable deliberative assessment. OpenAI o4-mini (OpenAI 2025) provided efficient evaluation at scale. Each model evaluated every theory 10 times to create robust average estimates.

**Table A15 LLM Configuration Parameters**

| <b>Parameter</b>       | <b>Claude-4-Sonnet</b>   | <b>GPT-o4-mini</b>  |
|------------------------|--------------------------|---------------------|
| Model Version          | claude-sonnet-4-20250514 | o4-mini-2024        |
| System Prompt Delivery | Dedicated parameter      | Dedicated parameter |
| Output Format          | Structured JSON          | Structured JSON     |
| Evaluations per Theory | 10                       | 10                  |

**E.4.2. Evaluation Prompt** The following standardized prompt was delivered to both AI models:

### Listing 2: LLM Investor Evaluation System Prompt

```
# Early-Stage Startup Investor

You are an experienced early-stage startup investor evaluating strategic theories of value for
business ventures. Your role is to provide consistent, objective investment-focused
assessments based on your expertise in startup evaluation.

## Context

Participants were asked to articulate a theory of value--a causal narrative explaining how
the venture would create value by addressing the food waste problem. This differs from a
detailed business model in that it focuses on the underlying causal logic (e.g., "predictive
analytics reduces overordering, which cuts waste and improves margins").

## Evaluation Framework

As an investor, you will assess each theory on two key metrics:

### 1. Subjective Probability of Success (SPS)
Scale: 0-100%

Based on the theory provided, what is the probability that an entrepreneur with this theory will
successfully build a profitable tech startup that reduces restaurant food waste by 50% within
5 years?

### 2. Confidence in Theory Assessment (CIT)
Scale: 1-7

How confident are you in your probability assessment above?
- 1 = Very Low Confidence (high uncertainty in your assessment)
- 2 = Low Confidence
- 3 = Below Average Confidence
- 4 = Average Confidence
- 5 = Above Average Confidence
- 6 = High Confidence
- 7 = Very High Confidence (very certain about your assessment)

## Evaluation Guidelines

- Apply consistent investment standards across all theories
- Draw on your experience as an early-stage investor
- Base assessments on the theory content provided, not on assumptions
- Be realistic and avoid assessment inflation
- Consider both upside potential and downside risks

## Output Format

Respond ONLY with a JSON object in the following exact format:

```json
{
  "sps_llm": [0-100],
  "cit_llm": [1-7]
}
```

Do not include any additional text, explanations, or commentary outside the JSON object.
```

**E.4.3. Processing Architecture** The evaluation pipeline used the same parallel processing approach as our strategic assessment but with optimized parameters for the investor evaluation task. We maintained an asynchronous architecture using Python's `asyncio` framework, processing theories in batches of 30 across 33 total batches.

Concurrency limits remained conservative: 50 concurrent calls for Anthropic’s Claude and 100 for OpenAI. This differential approach balanced processing speed with API stability. The Level 2 optimization strategy achieved approximately 20-30x speedup compared to sequential processing.

The system incorporated robust error handling with automatic retry logic and checkpoint-based recovery. Checkpoints saved after each batch completion enabled resumption from interruptions without data loss. This architecture proved highly reliable across the 19,520 total API calls required (976 theories  $\times$  2 models  $\times$  10 evaluation runs per model) with 1951 out of 1952 theories evaluated successfully.

## E.5. Variable Construction

**E.5.1. Individual Model Scores** For each model and metric, we calculated the arithmetic mean across 10 independent evaluations:

$$\text{Model SPS}_i = \frac{1}{10} \sum_{r=1}^{10} \text{SPS}_{i,r} \quad (3)$$

$$\text{Model CIT}_i = \frac{1}{10} \sum_{r=1}^{10} \text{CIT}_{i,r} \quad (4)$$

where  $i$  indexes theories and  $r$  indexes evaluation runs.

**E.5.2. Cross-Model Consensus Scores** To mitigate model-specific biases, we created consensus measures:

$$\text{Consensus SPS}_i = \frac{\text{Claude SPS}_i + \text{GPT SPS}_i}{2} \quad (5)$$

$$\text{Consensus CIT}_i = \frac{\text{Claude CIT}_i + \text{GPT CIT}_i}{2} \quad (6)$$

These cross-model averages serve as our primary investor assessment variables.

## E.6. Validation and Reliability

### E.7. Inter-Rater Reliability for Success Probability and Confidence Measures

We assessed inter-rater reliability for success probability scale (SPS) and confidence in theory (CIT) measures using Cohen’s kappa coefficient. Both measures were discretized into categorical scales to enable comparison between human expert judgments and LLM evaluations.

### E.8. Distributional Properties

**E.8.1. Measurement Characteristics** SPS provides a continuous probability measure (0-100%), while CIT uses a 7-point ordinal scale. Both metrics are averaged across 20 independent evaluations (10 per model), reducing measurement error through aggregation.

### E.9. Quality Assurance

**E.9.1. Data Completeness** The evaluation pipeline achieved complete coverage of 1951<sup>2</sup> theories from 976 observations. Despite processing 39,040 individual API calls, the robust retry mechanisms ensured just one theory was excluded from the final dataset. The system achieved 38,824 successful API calls (99.4% success rate), with automatic retries handling the minimal failures. Processing required approximately 13.1 hours total (averaging 24.0 seconds per theory), demonstrating efficient large-scale evaluation.

<sup>2</sup> One failure

**Table A16 Inter-Rater Reliability for SPS and CIT Measures**

| Comparison       | SPS $\kappa$ | CIT $\kappa$ |
|------------------|--------------|--------------|
| Human vs Claude  | 0.257        | -0.020       |
| Human vs GPT     | 0.250        | 0.002        |
| Human vs LLM Avg | 0.257        | 0.005        |
| Claude vs GPT    | 0.636        | 0.020        |

*SPS*: Success Probability Scale (0-100) discretized into terciles based on expert data distribution: Low ( $\leq 20$ ), Medium (20-60), High ( $> 60$ ).

*CIT*: Confidence in Theory (1-7) discretized into Low (1-3), Medium (4-5), High (6-7).

*Interpretation*:  $\kappa < 0.20$  = Poor, 0.21-0.40 = Fair, 0.41-0.60 = Moderate, 0.61-0.80 = Substantial,  $> 0.80$  = Almost Perfect

**E.9.2. Robustness Checks** To ensure reliability of investor perspective measures:

### E.10. Final Variable Set

The investor evaluation process generated the following dependent variables:

**Table A17 Additional Dependent Variables from Investor Evaluation**

| Variable Name                                  | Description                                 | Source              |
|------------------------------------------------|---------------------------------------------|---------------------|
| <i>Human Expert Assessments</i>                |                                             |                     |
| human_investor_sps                             | Human expert probability assessment         | Human               |
| human_investor_cit                             | Human expert confidence assessment          | Human               |
| <i>LLM Consensus Assessments</i>               |                                             |                     |
| llm_investor_sps                               | Consensus subjective probability of success | Cross-model average |
| llm_investor_cit                               | Consensus confidence in theory assessment   | Cross-model average |
| <i>Model-Specific Variables</i>                |                                             |                     |
| claude_sps                                     | Claude's probability assessment             | Claude Sonnet 4     |
| claude_cit                                     | Claude's confidence assessment              | Claude Sonnet 4     |
| gpt_sps                                        | GPT's probability assessment                | GPT o4-mini         |
| gpt_cit                                        | GPT's confidence assessment                 | GPT o4-mini         |
| <i>Total: 8 investor perspective variables</i> |                                             |                     |

### **E.11. Limitations and Considerations**

Several limitations should be considered when interpreting investor perspective evaluations. First, LLMs lack actual investment experience and cannot replicate the tacit knowledge that real investors develop through repeated exposure to venture outcomes. The models base assessments on patterns in training data rather than genuine investment expertise.

Second, the evaluation occurs without context that would typically inform investment decisions—founder characteristics, team composition, market timing, or competitive dynamics. Real investment decisions integrate these factors with theory quality in ways our evaluation cannot capture.

Third, the specific success criteria—a profitable tech startup reducing restaurant food waste by 50% in 5 years—represents an ambitious target that may compress SPS scores toward the lower end of the scale. This specific goal was the challenge presented to participants, not a reflection of typical venture investment horizons.

Fourth, the confidence metric reflects the model’s self-assessed certainty rather than actual predictive accuracy. Without ground truth data on venture outcomes, we cannot validate whether higher confidence correlates with better predictions.

Finally, the models’ assessments may reflect biases in their training data about what constitutes an investable venture. If certain types of ventures are overrepresented in successful examples within the training corpus, evaluations may systematically favor familiar patterns over novel approaches.

### **E.12. Data and Code Availability**

All materials necessary to reproduce our investor evaluation methodology are publicly available. The complete evaluation prompt and configuration parameters are documented in this appendix. The parallel processing pipeline code, including batch management and error handling, is available at [https://github.com/abhinavboconni/AI-TheoryBasedDecisions\\_LLMEvaluation](https://github.com/abhinavboconni/AI-TheoryBasedDecisions_LLMEvaluation).

Anonymized evaluation results are provided in CSV format with the following structure: theory identifier (teresaID), theory text, individual model averages for both metrics, cross-model consensus scores, number of valid runs per model, and processing timestamps. This structure enables immediate use in statistical software while maintaining complete provenance information.

The checkpoint files enable verification of the evaluation process and support recovery if researchers need to extend evaluations. While saved in Python’s pickle format, we provide utilities to export data to platform-neutral formats (JSON, CSV) for broader accessibility.

**F. Difference in Difference Regressions****Table F.1 Main effects of Agentic AI and AI Model across all dependent variables**

| DV                     | SPS                           | CIT                          | Expert Quality               | Expert PS                    | Expert CIT                   | LLM Avg Quality              | LLM Avg PS                    | LLM Avg CIT                   |
|------------------------|-------------------------------|------------------------------|------------------------------|------------------------------|------------------------------|------------------------------|-------------------------------|-------------------------------|
| Post                   | 5.14***<br>(0.57)<br>[0.000]  | 0.19***<br>(0.04)<br>[0.000] | 0.17***<br>(0.05)<br>[0.002] | 0.05***<br>(0.01)<br>[0.000] | -0.05<br>(0.04)<br>[0.216]   | 0.04***<br>(0.01)<br>[0.003] | 0.15<br>(0.11)<br>[0.183]     | 0.01<br>(0.01)<br>[0.184]     |
| General AI × Post      | 2.60***<br>(0.89)<br>[0.004]  | 0.25***<br>(0.06)<br>[0.000] | 0.28***<br>(0.09)<br>[0.002] | 0.07***<br>(0.02)<br>[0.001] | 0.00<br>(0.06)<br>[0.993]    | 0.12***<br>(0.02)<br>[0.000] | 0.41**<br>(0.19)<br>[0.026]   | -0.01<br>(0.01)<br>[0.501]    |
| Agentic AI × Post      | 3.70***<br>(0.94)<br>[0.000]  | 0.25***<br>(0.06)<br>[0.000] | -0.02<br>(0.08)<br>[0.791]   | -0.01<br>(0.02)<br>[0.738]   | -0.10*<br>(0.06)<br>[0.096]  | 0.05**<br>(0.02)<br>[0.048]  | 0.54***<br>(0.19)<br>[0.005]  | -0.05***<br>(0.01)<br>[0.001] |
| GenAI Expertise        | 0.26<br>(0.59)<br>[0.653]     | 0.06<br>(0.04)<br>[0.157]    | -0.01<br>(0.06)<br>[0.863]   | -0.00<br>(0.01)<br>[0.735]   | -0.02<br>(0.04)<br>[0.684]   | -0.01<br>(0.02)<br>[0.471]   | 0.00<br>(0.12)<br>[0.989]     | -0.00<br>(0.01)<br>[0.727]    |
| Constant               | 62.01***<br>(2.81)<br>[0.000] | 4.82***<br>(0.20)<br>[0.000] | 2.67***<br>(0.29)<br>[0.000] | 0.39***<br>(0.06)<br>[0.000] | 6.10***<br>(0.19)<br>[0.000] | 3.14***<br>(0.08)<br>[0.000] | 19.30***<br>(0.58)<br>[0.000] | 4.61***<br>(0.04)<br>[0.000]  |
| Observations           | 1952.00                       | 1952.00                      | 1951.00                      | 1952.00                      | 1952.00                      | 1952.00                      | 1952.00                       | 1952.00                       |
| Number of Participants | 976.00                        | 976.00                       | 976.00                       | 976.00                       | 976.00                       | 976.00                       | 976.00                        | 976.00                        |
| R <sup>2</sup>         | 0.04                          | 0.06                         | 0.01                         | 0.01                         | 0.01                         | 0.00                         | 0.01                          | 0.00                          |
| Fixed Effects          | YES                           | YES                          | YES                          | YES                          | YES                          | YES                          | YES                           | YES                           |
| Clustered S.E.         | YES                           | YES                          | YES                          | YES                          | YES                          | YES                          | YES                           | YES                           |

Standard errors in parentheses; p-values in brackets. Standard errors clustered by individual.

\*:  $p < 0.10$ , \*\*:  $p < 0.05$ , \*\*\*:  $p < 0.01$ . GenAI Expertise is the mean of GenAI Familiarity and Prompt Skill.

**Table F.2 Main effects of Agentic AI and AI Model among PhD participants (with controls)**

| DV                     | SPS                            | CIT                          | Expert Quality              | Expert PS                   | Expert CIT                   | LLM Avg Quality              | LLM Avg PS                    | LLM Avg CIT                   |
|------------------------|--------------------------------|------------------------------|-----------------------------|-----------------------------|------------------------------|------------------------------|-------------------------------|-------------------------------|
| Post                   | 2.77***<br>(0.97)<br>[0.005]   | 0.23**<br>(0.09)<br>[0.015]  | 0.18<br>(0.14)<br>[0.179]   | 0.01<br>(0.03)<br>[0.608]   | -0.15<br>(0.12)<br>[0.187]   | 0.00<br>(0.03)<br>[0.939]    | -0.15<br>(0.26)<br>[0.564]    | 0.00<br>(0.03)<br>[0.977]     |
| General AI × Post      | 4.49**<br>(2.05)<br>[0.031]    | 0.11<br>(0.16)<br>[0.498]    | 0.48<br>(0.31)<br>[0.121]   | 0.15**<br>(0.07)<br>[0.037] | 0.31*<br>(0.19)<br>[0.095]   | 0.19**<br>(0.08)<br>[0.015]  | 0.36<br>(0.57)<br>[0.529]     | 0.02<br>(0.04)<br>[0.664]     |
| Agentic AI × Post      | 7.74***<br>(2.29)<br>[0.001]   | -0.06<br>(0.19)<br>[0.764]   | 0.11<br>(0.23)<br>[0.635]   | 0.05<br>(0.05)<br>[0.366]   | 0.07<br>(0.21)<br>[0.737]    | 0.10<br>(0.07)<br>[0.142]    | 0.49<br>(0.52)<br>[0.348]     | -0.03<br>(0.04)<br>[0.465]    |
| GenAI Familiarity      | -2.25<br>(1.56)<br>[0.152]     | 0.14<br>(0.10)<br>[0.155]    | 0.13<br>(0.12)<br>[0.262]   | 0.05*<br>(0.03)<br>[0.073]  | 0.04<br>(0.11)<br>[0.699]    | 0.06*<br>(0.03)<br>[0.060]   | 0.66**<br>(0.31)<br>[0.033]   | -0.08***<br>(0.02)<br>[0.000] |
| Automation Bias        | 0.47<br>(0.99)<br>[0.636]      | 0.00<br>(0.07)<br>[0.965]    | 0.09<br>(0.09)<br>[0.368]   | 0.02<br>(0.02)<br>[0.381]   | -0.04<br>(0.07)<br>[0.581]   | 0.02<br>(0.03)<br>[0.628]    | 0.14<br>(0.26)<br>[0.599]     | 0.01<br>(0.01)<br>[0.683]     |
| Algo Aversion          | -1.74<br>(1.11)<br>[0.120]     | -0.06<br>(0.05)<br>[0.209]   | 0.20**<br>(0.08)<br>[0.017] | 0.04*<br>(0.02)<br>[0.069]  | 0.01<br>(0.08)<br>[0.854]    | 0.02<br>(0.02)<br>[0.371]    | 0.14<br>(0.17)<br>[0.427]     | -0.03**<br>(0.02)<br>[0.043]  |
| Constant               | 73.23***<br>(13.05)<br>[0.000] | 4.40***<br>(0.57)<br>[0.000] | 0.49<br>(0.86)<br>[0.572]   | -0.17<br>(0.21)<br>[0.434]  | 5.87***<br>(0.73)<br>[0.000] | 2.59***<br>(0.28)<br>[0.000] | 14.82***<br>(2.27)<br>[0.000] | 5.08***<br>(0.17)<br>[0.000]  |
| Observations           | 226.00                         | 226.00                       | 226.00                      | 226.00                      | 226.00                       | 226.00                       | 226.00                        | 226.00                        |
| Number of Participants | 113.00                         | 113.00                       | 113.00                      | 113.00                      | 113.00                       | 113.00                       | 113.00                        | 113.00                        |
| R <sup>2</sup>         | 0.01                           | 0.08                         | 0.13                        | 0.17                        | 0.00                         | 0.09                         | 0.03                          | 0.00                          |
| Fixed Effects          | YES                            | YES                          | YES                         | YES                         | YES                          | YES                          | YES                           | YES                           |
| Clustered S.E.         | YES                            | YES                          | YES                         | YES                         | YES                          | YES                          | YES                           | YES                           |

Standard errors in parentheses; p-values in brackets. Standard errors clustered by individual.

\*:  $p < 0.10$ , \*\*:  $p < 0.05$ , \*\*\*:  $p < 0.01$ . Controls: GenAI Familiarity, Automation Bias, Algorithm Aversion.

**Table F.3 Main effects of Agentic AI and AI Model among Non-PhD participants (with controls)**

| DV                     | SPS                           | CIT                          | Expert Quality               | Expert PS                    | Expert CIT                   | LLM Avg Quality              | LLM Avg PS                    | LLM Avg CIT                   |
|------------------------|-------------------------------|------------------------------|------------------------------|------------------------------|------------------------------|------------------------------|-------------------------------|-------------------------------|
| Post                   | 5.47***<br>(0.64)<br>[0.000]  | 0.18***<br>(0.04)<br>[0.000] | 0.17***<br>(0.06)<br>[0.004] | 0.05***<br>(0.01)<br>[0.000] | -0.03<br>(0.04)<br>[0.426]   | 0.04***<br>(0.01)<br>[0.001] | 0.20*<br>(0.12)<br>[0.095]    | 0.01<br>(0.01)<br>[0.174]     |
| General AI × Post      | 2.25**<br>(0.98)<br>[0.022]   | 0.26***<br>(0.07)<br>[0.000] | 0.25***<br>(0.09)<br>[0.008] | 0.06***<br>(0.02)<br>[0.007] | -0.04<br>(0.07)<br>[0.582]   | 0.10***<br>(0.02)<br>[0.000] | 0.39*<br>(0.20)<br>[0.054]    | -0.01<br>(0.01)<br>[0.378]    |
| Agentic AI × Post      | 3.17***<br>(1.01)<br>[0.002]  | 0.28***<br>(0.07)<br>[0.000] | -0.05<br>(0.09)<br>[0.614]   | -0.02<br>(0.02)<br>[0.406]   | -0.12*<br>(0.06)<br>[0.050]  | 0.03<br>(0.02)<br>[0.152]    | 0.51**<br>(0.20)<br>[0.013]   | -0.05***<br>(0.02)<br>[0.001] |
| GenAI Expertise        | 0.62<br>(0.57)<br>[0.274]     | 0.06<br>(0.05)<br>[0.221]    | -0.02<br>(0.06)<br>[0.772]   | -0.01<br>(0.01)<br>[0.462]   | -0.03<br>(0.04)<br>[0.490]   | -0.02<br>(0.02)<br>[0.226]   | -0.07<br>(0.11)<br>[0.510]    | 0.00<br>(0.01)<br>[0.618]     |
| Constant               | 61.29***<br>(2.72)<br>[0.000] | 4.89***<br>(0.22)<br>[0.000] | 2.73***<br>(0.31)<br>[0.000] | 0.42***<br>(0.06)<br>[0.000] | 6.17***<br>(0.20)<br>[0.000] | 3.18***<br>(0.07)<br>[0.000] | 19.70***<br>(0.54)<br>[0.000] | 4.58***<br>(0.04)<br>[0.000]  |
| Observations           | 1726.00                       | 1726.00                      | 1725.00                      | 1726.00                      | 1726.00                      | 1726.00                      | 1726.00                       | 1726.00                       |
| Number of Participants | 863.00                        | 863.00                       | 863.00                       | 863.00                       | 863.00                       | 863.00                       | 863.00                        | 863.00                        |
| $R^2$                  | 0.05                          | 0.05                         | 0.00                         | 0.00                         | 0.00                         | 0.00                         | 0.00                          | 0.00                          |
| Fixed Effects          | YES                           | YES                          | YES                          | YES                          | YES                          | YES                          | YES                           | YES                           |
| Clustered S.E.         | YES                           | YES                          | YES                          | YES                          | YES                          | YES                          | YES                           | YES                           |

Standard errors in parentheses; p-values in brackets. Standard errors clustered by individual.

\*:  $p < 0.10$ , \*\*:  $p < 0.05$ , \*\*\*:  $p < 0.01$ . Control: GenAI Expertise (mean of Familiarity and Prompt Skill).

**Table F.4 Main effects of Agentic AI and AI Model among High Mng Exp participants (with controls)**

| DV                     | SPS                           | CIT                          | Expert Quality               | Expert PS                    | Expert CIT                   | LLM Avg Quality              | LLM Avg PS                    | LLM Avg CIT                  |
|------------------------|-------------------------------|------------------------------|------------------------------|------------------------------|------------------------------|------------------------------|-------------------------------|------------------------------|
| Post                   | 4.48***<br>(1.11)<br>[0.000]  | 0.07<br>(0.09)<br>[0.452]    | 0.01<br>(0.15)<br>[0.933]    | 0.03<br>(0.03)<br>[0.381]    | -0.07<br>(0.10)<br>[0.477]   | 0.04<br>(0.03)<br>[0.144]    | 0.47*<br>(0.26)<br>[0.071]    | -0.00<br>(0.02)<br>[0.873]   |
| General AI × Post      | 0.33<br>(1.76)<br>[0.853]     | 0.25*<br>(0.13)<br>[0.051]   | 0.18<br>(0.21)<br>[0.390]    | 0.05<br>(0.04)<br>[0.250]    | 0.05<br>(0.15)<br>[0.725]    | 0.07<br>(0.05)<br>[0.184]    | 0.16<br>(0.39)<br>[0.680]     | -0.01<br>(0.03)<br>[0.683]   |
| Agentic AI × Post      | 3.86*<br>(2.31)<br>[0.097]    | 0.41***<br>(0.16)<br>[0.009] | 0.41*<br>(0.21)<br>[0.054]   | 0.05<br>(0.04)<br>[0.238]    | -0.15<br>(0.15)<br>[0.303]   | 0.13**<br>(0.05)<br>[0.014]  | 0.85*<br>(0.49)<br>[0.085]    | -0.06<br>(0.04)<br>[0.102]   |
| GenAI Familiarity      | 0.17<br>(0.93)<br>[0.852]     | -0.04<br>(0.06)<br>[0.569]   | -0.08<br>(0.09)<br>[0.350]   | -0.02<br>(0.02)<br>[0.443]   | -0.06<br>(0.07)<br>[0.353]   | -0.00<br>(0.02)<br>[0.850]   | -0.11<br>(0.25)<br>[0.665]    | 0.01<br>(0.01)<br>[0.678]    |
| Constant               | 62.25***<br>(4.25)<br>[0.000] | 5.13***<br>(0.28)<br>[0.000] | 2.77***<br>(0.39)<br>[0.000] | 0.39***<br>(0.10)<br>[0.000] | 6.31***<br>(0.31)<br>[0.000] | 3.01***<br>(0.08)<br>[0.000] | 19.05***<br>(1.13)<br>[0.000] | 4.60***<br>(0.06)<br>[0.000] |
| Observations           | 368.00                        | 368.00                       | 368.00                       | 368.00                       | 368.00                       | 368.00                       | 368.00                        | 368.00                       |
| Number of Participants | 184.00                        | 184.00                       | 184.00                       | 184.00                       | 184.00                       | 184.00                       | 184.00                        | 184.00                       |
| R <sup>2</sup>         | 0.03                          | 0.00                         | 0.02                         | 0.02                         | 0.00                         | 0.01                         | 0.00                          | 0.00                         |
| Fixed Effects          | YES                           | YES                          | YES                          | YES                          | YES                          | YES                          | YES                           | YES                          |
| Clustered S.E.         | YES                           | YES                          | YES                          | YES                          | YES                          | YES                          | YES                           | YES                          |

Standard errors in parentheses; p-values in brackets. Standard errors clustered by individual.

\*:  $p < 0.10$ , \*\*:  $p < 0.05$ , \*\*\*:  $p < 0.01$ . Control: GenAI Familiarity.

**Table F.5 Main effects of Agentic AI and AI Model among Low Mng Exp participants (with controls)**

| DV                     | SPS                           | CIT                          | Expert Quality               | Expert PS                    | Expert CIT                   | LLM Avg Quality              | LLM Avg PS                    | LLM Avg CIT                   |
|------------------------|-------------------------------|------------------------------|------------------------------|------------------------------|------------------------------|------------------------------|-------------------------------|-------------------------------|
| Post                   | 5.31***<br>(0.66)<br>[0.000]  | 0.21***<br>(0.05)<br>[0.000] | 0.20***<br>(0.06)<br>[0.000] | 0.05***<br>(0.01)<br>[0.000] | -0.04<br>(0.04)<br>[0.294]   | 0.03***<br>(0.01)<br>[0.008] | 0.07<br>(0.12)<br>[0.548]     | 0.02<br>(0.01)<br>[0.110]     |
| General AI × Post      | 3.27***<br>(1.02)<br>[0.001]  | 0.26***<br>(0.07)<br>[0.000] | 0.32***<br>(0.10)<br>[0.002] | 0.07***<br>(0.02)<br>[0.001] | -0.01<br>(0.07)<br>[0.883]   | 0.13***<br>(0.03)<br>[0.000] | 0.47**<br>(0.21)<br>[0.026]   | -0.01<br>(0.01)<br>[0.607]    |
| Agentic AI × Post      | 3.70***<br>(1.03)<br>[0.000]  | 0.22***<br>(0.07)<br>[0.001] | -0.12<br>(0.09)<br>[0.194]   | -0.02<br>(0.02)<br>[0.364]   | -0.09<br>(0.07)<br>[0.176]   | 0.03<br>(0.03)<br>[0.283]    | 0.47**<br>(0.20)<br>[0.020]   | -0.04***<br>(0.02)<br>[0.003] |
| GenAI Expertise        | -0.15<br>(0.70)<br>[0.833]    | 0.06<br>(0.05)<br>[0.244]    | 0.02<br>(0.07)<br>[0.770]    | 0.00<br>(0.01)<br>[0.934]    | -0.01<br>(0.05)<br>[0.903]   | -0.01<br>(0.02)<br>[0.521]   | 0.02<br>(0.14)<br>[0.873]     | -0.00<br>(0.01)<br>[0.676]    |
| Constant               | 64.02***<br>(3.39)<br>[0.000] | 4.86***<br>(0.24)<br>[0.000] | 2.58***<br>(0.33)<br>[0.000] | 0.38***<br>(0.07)<br>[0.000] | 6.05***<br>(0.22)<br>[0.000] | 3.17***<br>(0.10)<br>[0.000] | 19.37***<br>(0.70)<br>[0.000] | 4.61***<br>(0.05)<br>[0.000]  |
| Observations           | 1584.00                       | 1584.00                      | 1583.00                      | 1584.00                      | 1584.00                      | 1584.00                      | 1584.00                       | 1584.00                       |
| Number of Participants | 792.00                        | 792.00                       | 792.00                       | 792.00                       | 792.00                       | 792.00                       | 792.00                        | 792.00                        |
| $R^2$                  | 0.02                          | 0.06                         | 0.03                         | 0.03                         | 0.00                         | 0.00                         | 0.01                          | 0.00                          |
| Fixed Effects          | YES                           | YES                          | YES                          | YES                          | YES                          | YES                          | YES                           | YES                           |
| Clustered S.E.         | YES                           | YES                          | YES                          | YES                          | YES                          | YES                          | YES                           | YES                           |

Standard errors in parentheses; p-values in brackets. Standard errors clustered by individual.

\*:  $p < 0.10$ , \*\*:  $p < 0.05$ , \*\*\*:  $p < 0.01$ . Control: GenAI Expertise (mean of Familiarity and Prompt Skill).

## G. Correlation Tables

|                           | SPS (pre) | CIT (pre) | Expert Quality (pre) | Expert Probability (pre) | Expert Confidence (pre) | LLM Avg Quality (pre) | LLM Avg Probability (pre) | LLM Avg Confidence (pre) | GPT Familiarity (pre) | Prompt Skill (pre) | Algo Aversion (pre) | Automation Bias (pre) | Confidence (pre) |
|---------------------------|-----------|-----------|----------------------|--------------------------|-------------------------|-----------------------|---------------------------|--------------------------|-----------------------|--------------------|---------------------|-----------------------|------------------|
| SPS (pre)                 | 1.000     | 0.609     | 0.264                | 0.268                    | -0.043                  | 0.278                 | 0.243                     | -0.046                   | 0.255                 | 0.251              | -0.223              | 0.342                 | 0.372            |
| CIT (pre)                 | 0.609     | 1.000     | 0.220                | 0.224                    | -0.014                  | 0.227                 | 0.192                     | 0.005                    | 0.252                 | 0.288              | -0.194              | 0.249                 | 0.386            |
| Expert Quality (pre)      | 0.264     | 0.220     | 1.000                | 0.919                    | -0.255                  | 0.742                 | 0.670                     | -0.080                   | 0.270                 | 0.233              | -0.089              | 0.217                 | 0.146            |
| Expert Probability (pre)  | 0.268     | 0.224     | 0.919                | 1.000                    | -0.220                  | 0.747                 | 0.683                     | -0.085                   | 0.283                 | 0.228              | -0.088              | 0.235                 | 0.162            |
| Expert Confidence (pre)   | -0.043    | -0.014    | -0.255               | -0.220                   | 1.000                   | -0.200                | -0.212                    | 0.104                    | -0.050                | -0.023             | -0.057              | -0.004                | -0.025           |
| LLM Avg Quality (pre)     | 0.278     | 0.227     | 0.742                | 0.747                    | -0.200                  | 1.000                 | 0.894                     | -0.255                   | 0.231                 | 0.201              | -0.079              | 0.183                 | 0.144            |
| LLM Avg Probability (pre) | 0.243     | 0.192     | 0.670                | 0.683                    | -0.212                  | 0.894                 | 1.000                     | -0.379                   | 0.216                 | 0.197              | -0.036              | 0.126                 | 0.123            |
| LLM Avg Confidence (pre)  | -0.046    | 0.005     | -0.080               | -0.085                   | 0.104                   | -0.255                | -0.379                    | 1.000                    | -0.067                | -0.052             | -0.038              | 0.040                 | -0.013           |
| GPT Familiarity (pre)     | 0.255     | 0.252     | 0.270                | 0.283                    | -0.050                  | 0.231                 | 0.216                     | -0.067                   | 1.000                 | 0.689              | -0.301              | 0.404                 | 0.285            |
| Prompt Skill (pre)        | 0.251     | 0.288     | 0.233                | 0.228                    | -0.023                  | 0.201                 | 0.197                     | -0.052                   | 0.689                 | 1.000              | -0.213              | 0.355                 | 0.367            |
| Algo Aversion (pre)       | -0.223    | -0.194    | -0.089               | -0.088                   | -0.057                  | -0.079                | -0.036                    | -0.038                   | -0.301                | -0.213             | 1.000               | -0.359                | -0.084           |
| Automation Bias (pre)     | 0.342     | 0.249     | 0.217                | 0.235                    | -0.004                  | 0.183                 | 0.126                     | 0.040                    | 0.404                 | 0.355              | -0.359              | 1.000                 | 0.184            |
| Confidence (pre)          | 0.372     | 0.386     | 0.146                | 0.162                    | -0.025                  | 0.144                 | 0.123                     | -0.013                   | 0.285                 | 0.367              | -0.084              | 0.184                 | 1.000            |

|                            | SPS (post) | CIT (post) | Expert Quality (post) | Expert Probability (post) | Expert Confidence (post) | LLM Avg Quality (post) | LLM Avg Probability (post) | LLM Avg Confidence (post) | GPT Familiarity (post) | Prompt Skill (post) | Algo Aversion (post) | Automation Bias (post) | Confidence (post) |
|----------------------------|------------|------------|-----------------------|---------------------------|--------------------------|------------------------|----------------------------|---------------------------|------------------------|---------------------|----------------------|------------------------|-------------------|
| SPS (post)                 | 1.000      | 0.674      | 0.246                 | 0.232                     | 0.030                    | 0.233                  | 0.191                      | -0.030                    | 0.261                  | 0.272               | -0.110               | 0.313                  | 0.477             |
| CIT (post)                 | 0.674      | 1.000      | 0.205                 | 0.188                     | 0.001                    | 0.198                  | 0.158                      | 0.013                     | 0.270                  | 0.311               | -0.073               | 0.225                  | 0.494             |
| Expert Quality (post)      | 0.246      | 0.205      | 1.000                 | 0.912                     | -0.077                   | 0.691                  | 0.602                      | -0.121                    | 0.224                  | 0.233               | -0.029               | 0.134                  | 0.126             |
| Expert Probability (post)  | 0.232      | 0.188      | 0.912                 | 1.000                     | -0.035                   | 0.719                  | 0.638                      | -0.119                    | 0.232                  | 0.231               | -0.014               | 0.136                  | 0.148             |
| Expert Confidence (post)   | 0.030      | 0.001      | -0.077                | -0.035                    | 1.000                    | -0.056                 | -0.109                     | 0.125                     | 0.017                  | -0.018              | -0.077               | 0.031                  | -0.032            |
| LLM Avg Quality (post)     | 0.233      | 0.198      | 0.691                 | 0.719                     | -0.056                   | 1.000                  | 0.871                      | -0.281                    | 0.210                  | 0.213               | -0.008               | 0.125                  | 0.140             |
| LLM Avg Probability (post) | 0.191      | 0.158      | 0.602                 | 0.638                     | -0.109                   | 0.871                  | 1.000                      | -0.423                    | 0.188                  | 0.194               | 0.030                | 0.072                  | 0.113             |
| LLM Avg Confidence (post)  | -0.030     | 0.013      | -0.121                | -0.119                    | 0.125                    | -0.281                 | -0.423                     | 1.000                     | -0.048                 | -0.051              | -0.016               | 0.007                  | -0.001            |
| GPT Familiarity (post)     | 0.261      | 0.270      | 0.224                 | 0.232                     | 0.017                    | 0.210                  | 0.188                      | -0.048                    | 1.000                  | 0.702               | -0.142               | 0.350                  | 0.360             |
| Prompt Skill (post)        | 0.272      | 0.311      | 0.233                 | 0.231                     | -0.018                   | 0.213                  | 0.194                      | -0.051                    | 0.702                  | 1.000               | -0.080               | 0.335                  | 0.430             |
| Algo Aversion (post)       | -0.110     | -0.073     | -0.029                | -0.014                    | -0.077                   | -0.008                 | 0.030                      | -0.016                    | -0.142                 | -0.080              | 1.000                | -0.323                 | 0.077             |
| Automation Bias (post)     | 0.313      | 0.225      | 0.134                 | 0.136                     | 0.031                    | 0.125                  | 0.072                      | 0.007                     | 0.350                  | 0.335               | -0.323               | 1.000                  | 0.211             |
| Confidence (post)          | 0.477      | 0.494      | 0.126                 | 0.148                     | -0.032                   | 0.140                  | 0.113                      | -0.001                    | 0.360                  | 0.430               | 0.077                | 0.211                  | 1.000             |

|                              | $\Delta$ SPS | $\Delta$ CIT | $\Delta$ Expert Quality | $\Delta$ Expert Probability | $\Delta$ Expert Confidence | $\Delta$ LLM Avg Quality | $\Delta$ LLM Avg Probability | $\Delta$ LLM Avg Confidence | $\Delta$ GPT Familiarity | $\Delta$ Prompt Skill | $\Delta$ Algo Aversion | $\Delta$ Automation Bias |
|------------------------------|--------------|--------------|-------------------------|-----------------------------|----------------------------|--------------------------|------------------------------|-----------------------------|--------------------------|-----------------------|------------------------|--------------------------|
| $\Delta$ SPS                 | 1.000        | 0.534        | 0.170                   | 0.207                       | -0.042                     | 0.225                    | 0.172                        | -0.033                      | 0.023                    | 0.011                 | -0.134                 | 0.111                    |
| $\Delta$ CIT                 | 0.534        | 1.000        | 0.142                   | 0.161                       | -0.020                     | 0.174                    | 0.142                        | -0.038                      | 0.053                    | 0.033                 | -0.122                 | 0.108                    |
| $\Delta$ Expert Quality      | 0.170        | 0.142        | 1.000                   | 0.817                       | -0.087                     | 0.433                    | 0.316                        | -0.025                      | 0.011                    | -0.014                | 0.008                  | 0.071                    |
| $\Delta$ Expert Probability  | 0.207        | 0.161        | 0.817                   | 1.000                       | -0.027                     | 0.451                    | 0.322                        | -0.028                      | 0.024                    | -0.035                | 0.008                  | 0.077                    |
| $\Delta$ Expert Confidence   | -0.042       | -0.020       | -0.087                  | -0.027                      | 1.000                      | -0.054                   | -0.102                       | 0.040                       | -0.007                   | -0.016                | -0.023                 | 0.008                    |
| $\Delta$ LLM Avg Quality     | 0.225        | 0.174        | 0.433                   | 0.451                       | -0.054                     | 1.000                    | 0.684                        | -0.244                      | 0.014                    | -0.038                | -0.089                 | 0.090                    |
| $\Delta$ LLM Avg Probability | 0.172        | 0.142        | 0.316                   | 0.322                       | -0.102                     | 0.684                    | 1.000                        | -0.356                      | 0.016                    | -0.006                | -0.057                 | 0.047                    |
| $\Delta$ LLM Avg Confidence  | -0.033       | -0.038       | -0.025                  | -0.028                      | 0.040                      | -0.244                   | -0.356                       | 1.000                       | -0.036                   | 0.010                 | -0.041                 | -0.019                   |
| $\Delta$ GPT Familiarity     | 0.023        | 0.053        | 0.011                   | 0.024                       | -0.007                     | 0.014                    | 0.016                        | -0.036                      | 1.000                    | 0.201                 | -0.091                 | 0.221                    |
| $\Delta$ Prompt Skill        | 0.011        | 0.033        | -0.014                  | -0.035                      | -0.016                     | -0.038                   | -0.006                       | 0.010                       | 0.201                    | 1.000                 | -0.080                 | 0.180                    |
| $\Delta$ Algo Aversion       | -0.134       | -0.122       | 0.008                   | 0.008                       | -0.023                     | -0.089                   | -0.057                       | -0.041                      | -0.091                   | -0.080                | 1.000                  | -0.184                   |
| $\Delta$ Automation Bias     | 0.111        | 0.108        | 0.071                   | 0.077                       | 0.008                      | 0.090                    | 0.047                        | -0.019                      | 0.221                    | 0.180                 | -0.184                 | 1.000                    |

## References

- Anthropic (2024) Claude's extended thinking. URL <https://www.anthropic.com/news/visible-extended-thinking>.
- Anthropic (2025) Introducing claude 4. URL <https://www.anthropic.com/news/claude-4>.
- Boussioux L, Lane JN, Zhang M, Jacimovic V, Lakhani KR (2024) The crowdless future? generative ai and creative problem-solving. Organization Science 35(5):1589–1607.
- Doshi AR, Bell JJ, Mirzayev E, Vanneste BS (2025) Generative artificial intelligence and evaluating strategic decisions. Strategic Management Journal 46(3):583–610.
- Gompers P, Gornall W, Kaplan SN, Strebulaev IA (2020) How do venture capitalists make decisions? Journal of Financial Economics 135(1):169–190.
- Kaplan SN, Sensoy BA, Strömberg P (2009) Should investors bet on the jockey or the horse? evidence from the evolution of firms from early business plans to public companies. The Journal of Finance 64(1):75–115.
- OpenAI (2025) Introducing openai o3 and o4-mini. URL <https://openai.com/index/introducing-o3-and-o4-mini/>.
- Zacharakis AL, Meyer GD (2000) The potential of actuarial decision models: Can they improve the venture capital investment decision? Journal of Business Venturing 15(4):323–346.
